# Supplementary material for: Determinants of non-primary, primary, and exclusive use of liquefied petroleum gas vary significantly in a nationally representative survey in Ghana
Source: Research Square preprint supplement (doi:10.21203/rs.3.rs-1785400/v1), 2022-06-27
Supplement: Supplementary file 1 [file fad8e797a4235fbaeea5d3ab.pdf]

1 **Supplementary Information:**

2  
3 **Determinants of non-primary, primary, and exclusive use of**  
4 **liquefied petroleum gas (LPG) vary significantly in a**  
5 **nationally representative survey in Ghana**

6  
7 Abhishek Kar\*<sup>1</sup>, Theresa Tawiah<sup>2</sup>, Linnea Graham<sup>1</sup>, Georgette Owusu-Amankwah<sup>1</sup>,  
8 Misbath Daouda<sup>1</sup>, Flavio Malagutti<sup>3</sup>, Steve Chillrud<sup>4</sup>, Seidu Iddrisu<sup>2</sup>, Edward A. Apraku<sup>2</sup>,  
9 Richard Tetteh<sup>2</sup>, Kelsey Jack<sup>3</sup>, Sulemana W. Abubakari<sup>2</sup>, Darby Jack<sup>1</sup>, Kwaku P.  
10 Asante<sup>2</sup>

11  
12 <sup>1</sup>Columbia World Projects, Columbia University, New York, USA

13 <sup>2</sup>Kintampo Health Research Centre, Research and Development Division, Ghana  
14 Health Service, Kintampo North Municipality, Bono East Region, Ghana

15 <sup>3</sup>Bren School of Environmental Science and Management, University of California,  
16 Santa Barbara, USA

17 <sup>4</sup>Lamont-Doherty Earth Observatory, Columbia University, New York, USA  
18  
19  
20  
21  
22  
23  
24  
25  
26  
27  
28  
29  
30  
31  
32  
33  
34  
35  
36

37 **SI1: Sociodemographic and economic relationship with LPG use level**

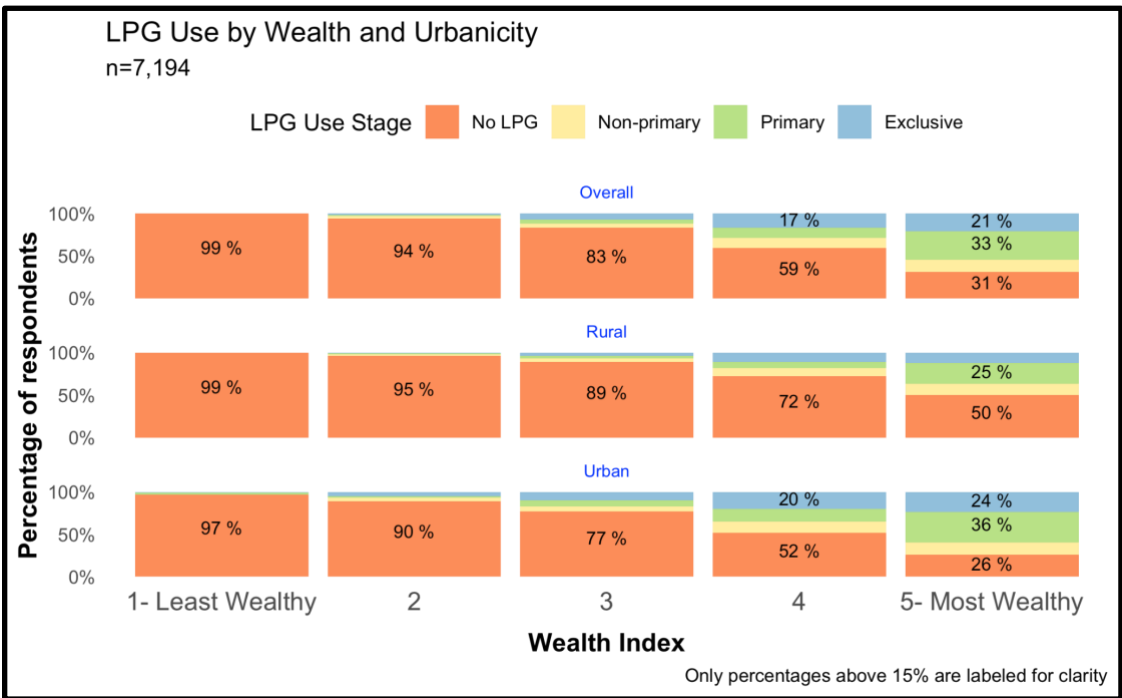

39 Figure SI1: LPG Use levels by Wealth & Geography: 100% Stacked bar of LPG use by stage when  
40 respondents are grouped by wealth index score quintiles

41

42

43 **SI2: Regional variation in LPG use as main cooking fuel**

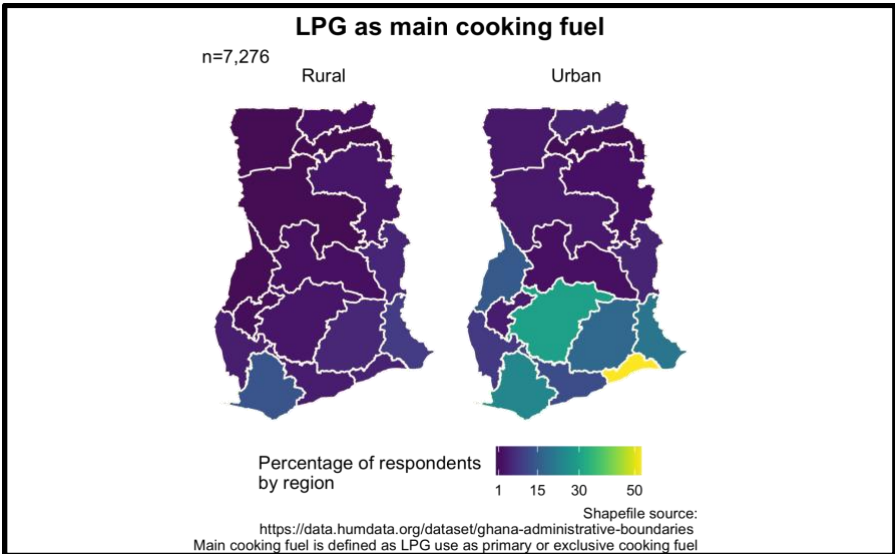

45 Figure SI2: Use of LPG as main fuel by region and urbanicity. Main fuel implies primary or exclusive use.  
46 "Only urban Accra has a majority of households using LPG as main fuel".  
47  
48  
49  
50

SI3: Correlation among quantitative indicators of LPG use

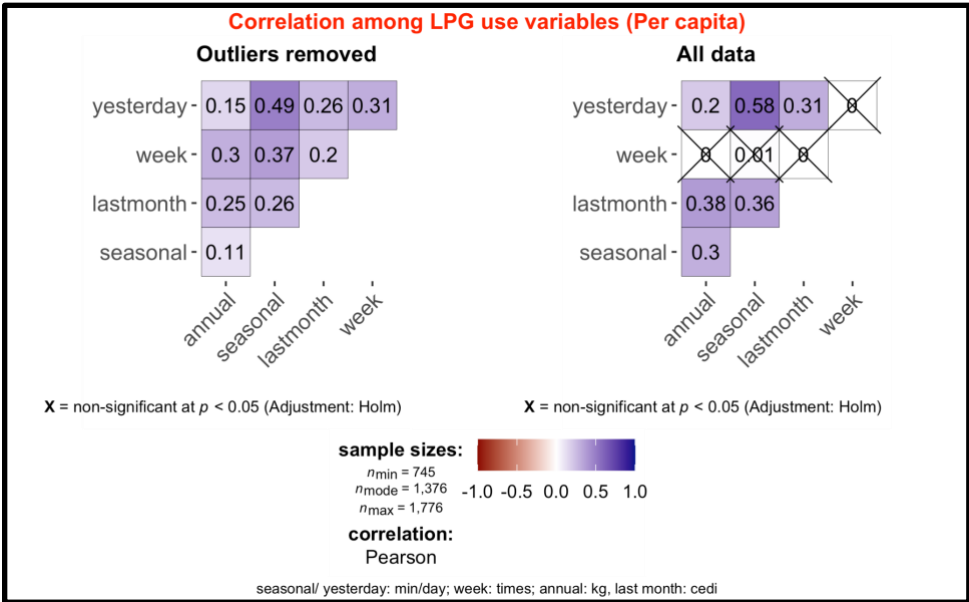

Figure SI3: Correlation among five quantitative LPG use indicators. While there is no negative correlation, the strength of the relationship improves from weak to moderate only when outliers are removed.

SI4: Behavioral perception on advantages and disadvantages of LPG use

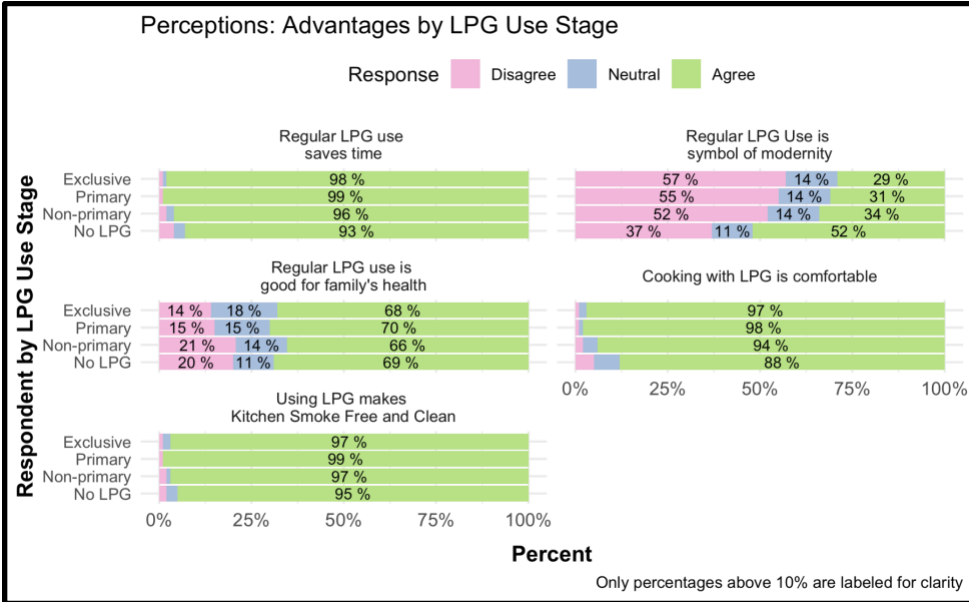

Figure SI4: Responses to five statements on advantages of LPG when respondents grouped by stage of LPG use. There is limited variation in response by stage.

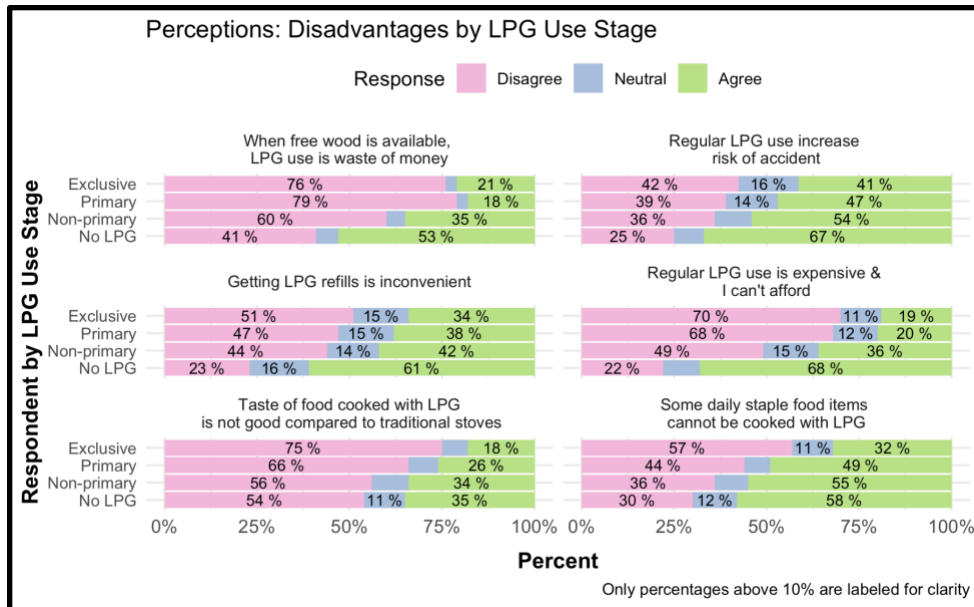

Figure SI5: Responses to five statements on disadvantages of LPG when respondents grouped by stage of LPG use. There is limited variation in response by stage.

### Processing of Perception Scores

$$\text{Advan\_total} = \text{stove\_gas\_pref\_3} + \text{stove\_gas\_pref\_5} + \text{stove\_gas\_pref\_7} + \text{stove\_gas\_pref\_9} + \text{stove\_gas\_pref\_11}$$

The five variables represent the 5 statements from Figure SI5

#1: Agree becomes +1 points for agreeing with a positive sentiment about LPG; 2: Neutral becomes 0 points for neutral with a positive sentiment; #3: Disagree becomes -1 point for disagreeing with a positive sentiment; Higher score signals more favorable feeling towards LPG. A higher advantages total score indicates a more positive feeling toward LPG. The range of the *Advan\_total* variable is +5 to -5

$$\text{disadvan\_total} = \text{stove\_gas\_pref\_1} + \text{stove\_gas\_pref\_2} + \text{stove\_gas\_pref\_4} + \text{stove\_gas\_pref\_6} + \text{stove\_gas\_pref\_8} + \text{stove\_gas\_pref\_10}$$

The six variables represent the 6 statements from Figure SI4

#1: Agree becomes -1 points for agreeing with the negative sentiment about LPG; 2: Neutral becomes 0 points for neutral with a negative sentiment; #3: Disagree becomes +1 point for disagreeing with negative sentiment (double negative= positive); Higher

score signals more favorable feelings toward LPG: negating the negative feeling about LPG. The range of the *Disadvan\_total* variable is +6 to -6

#### **SI4: Binary logistic regression for three processes**

##### Choice of independent variables

We excluded a few frequently mentioned factors in the literature for three reasons. First, some factors were already captured more reliably by the listed factors. For example, we consider wealth index over income/ expenditure metrics due to reliability issues around direct response to income and expenditure estimates. Studies have shown that income estimates are often subject to social desirability bias as well as recall bias (Kar et al., 2020). Second, some factors were dropped due to restrictions imposed by statistical analysis models. For example, the autonomy factor related to ‘Primary Cook is also household head’ is dropped. The factor is accounted for indirectly as we include the age & gender of the household head in the analysis. When the primary cook is the same as the household head, there will be an absolute correlation between primary cook age/ gender and household head age/gender when the value of the third variable (Primary Cook= Household Head) is 1. It would violate core assumptions around multicollinearity. Third, we made a judgment call that some factors were not particularly relevant in the study context, i.e. they are not likely to play a differentiating role in the transition process. For example, social strata/ caste are more relevant in the Indian context compared to Ghana. We also did not use factors like the price of LPG as all survey respondents were subject to the market price (and its fluctuations) in Ghana. Fourth, we applied some factors conditionally to the three sub-transition process analyses. For example, the burner number is 0 for those who don’t have LPG. If a household does not use LPG, the LPG burner number (=0) is a result of them not using LPG indicating reverse causality. Hence, we did not include them for the *uptake* sub-transition but as an important predictor for the other processes.

## Processing of raw variables

While some predictor variables were used as-is from the survey data like age and gender, others like wealth index and family size were processed from the raw data. Detailed notes on the processing of variables are available in the companion R codes. For a few variables we have used two ways: original form as continuous, such as age, and categorical by splitting age into three groups (Table SI6).

| Factor Description                                                                                                                                                                                              | Type used for regression   | Data Processing, if any                                                                                                                                                                                                                                                                                                            |                            |                            |                   |     |                       |     |                    |     |                     |     |
|-----------------------------------------------------------------------------------------------------------------------------------------------------------------------------------------------------------------|----------------------------|------------------------------------------------------------------------------------------------------------------------------------------------------------------------------------------------------------------------------------------------------------------------------------------------------------------------------------|----------------------------|----------------------------|-------------------|-----|-----------------------|-----|--------------------|-----|---------------------|-----|
| 1. Wealth Index Score                                                                                                                                                                                           | Continuous and Categorical | Wealth Index Score Calculation is detailed in Annexure 1 and appended with this Supplementary Information. When a categorical version of the wealth index score is used, we categorize the 1st to 3rd quantile range as “middle class”. Lower and higher values beyond the range are categorized as “Poor” and “Rich” respectively |                            |                            |                   |     |                       |     |                    |     |                     |     |
| 2. Family/ Household Size                                                                                                                                                                                       | Continuous and Categorical | We adapt the "Standard adult" equivalence factors defined in terms of sex and age when calculating household size from the list of household members as per the Kitchen Performance Test Protocol (Bailis, 2007)                                                                                                                   |                            |                            |                   |     |                       |     |                    |     |                     |     |
|                                                                                                                                                                                                                 |                            | <table><tr><td>Gender and age</td><td>Fraction of Standard Adult</td></tr><tr><td>Child: 0-14 years</td><td>0.5</td></tr><tr><td>Female: over 14 years</td><td>0.8</td></tr><tr><td>Male: 15- 59 years</td><td>1.0</td></tr><tr><td>Male: Over 59 years</td><td>0.8</td></tr></table>                                              | Gender and age             | Fraction of Standard Adult | Child: 0-14 years | 0.5 | Female: over 14 years | 0.8 | Male: 15- 59 years | 1.0 | Male: Over 59 years | 0.8 |
|                                                                                                                                                                                                                 |                            | Gender and age                                                                                                                                                                                                                                                                                                                     | Fraction of Standard Adult |                            |                   |     |                       |     |                    |     |                     |     |
|                                                                                                                                                                                                                 |                            | Child: 0-14 years                                                                                                                                                                                                                                                                                                                  | 0.5                        |                            |                   |     |                       |     |                    |     |                     |     |
|                                                                                                                                                                                                                 |                            | Female: over 14 years                                                                                                                                                                                                                                                                                                              | 0.8                        |                            |                   |     |                       |     |                    |     |                     |     |
|                                                                                                                                                                                                                 |                            | Male: 15- 59 years                                                                                                                                                                                                                                                                                                                 | 1.0                        |                            |                   |     |                       |     |                    |     |                     |     |
|                                                                                                                                                                                                                 |                            | Male: Over 59 years                                                                                                                                                                                                                                                                                                                | 0.8                        |                            |                   |     |                       |     |                    |     |                     |     |
| When a categorical version of the household size is used, we categorize the 1st to 3rd quantile range as “Medium”. Lower and higher values beyond the range are categorized as “Small” and “Large” respectively |                            |                                                                                                                                                                                                                                                                                                                                    |                            |                            |                   |     |                       |     |                    |     |                     |     |
| 3. Age of primary cook                                                                                                                                                                                          | Continuous and Categorical | As is from the survey database; when a categorical version of the age of primary cook is used, we categorize the 1st to 3rd quantile range as “middle age”. Lower and higher values beyond the range are categorized as “Young” and “Old” respectively                                                                             |                            |                            |                   |     |                       |     |                    |     |                     |     |
| 4. Gender of primary cook                                                                                                                                                                                       | Categorical                | As is from survey database                                                                                                                                                                                                                                                                                                         |                            |                            |                   |     |                       |     |                    |     |                     |     |

| 5. Education of primary cook                  | Categorical                | <p>Respondents chose from the following options:</p> <ul style="list-style-type: none"> <li>-10 None</li> <li>1 Primary school: uncompleted</li> <li>2 Primary school: completed</li> <li>3 Middle/Junior HS: uncompleted</li> <li>4 Middle/Junior HS: completed</li> <li>5 SHS/Commercial/Technical: uncompleted</li> <li>6 SHS/Commercial/Technical: completed</li> <li>7 Post-middle training: teachers, secretarial, etc.</li> <li>8 Post-sec training: Nursing, Teacher, Polytechnic, etc.</li> <li>9 University: undergraduate completed</li> <li>10 University: undergraduate uncompleted</li> <li>11 University: masters or higher uncompleted</li> <li>12 University: masters or higher completed</li> <li>-99 I Don't Know</li> <li>-88 I Don't Want to Answer</li> </ul> <p>We categorized 1-5 &amp; -10 as “No Higher Education”, 6-12 as “Higher Education” and -88, -99 &amp; NA (missing) as NA (missing)</p> |     |     |          |    |   |     |   |   |        |   |   |      |
|-----------------------------------------------|----------------------------|------------------------------------------------------------------------------------------------------------------------------------------------------------------------------------------------------------------------------------------------------------------------------------------------------------------------------------------------------------------------------------------------------------------------------------------------------------------------------------------------------------------------------------------------------------------------------------------------------------------------------------------------------------------------------------------------------------------------------------------------------------------------------------------------------------------------------------------------------------------------------------------------------------------------------|-----|-----|----------|----|---|-----|---|---|--------|---|---|------|
| 6. Age of household head                      | Continuous and Categorical | As is from the survey database, when a categorical version of the age of hh-head is used, we categorize the 1st to 3rd quantile range as “middle age”. Lower and higher values beyond the range are categorized as “Young” and “Old” respectively                                                                                                                                                                                                                                                                                                                                                                                                                                                                                                                                                                                                                                                                            |     |     |          |    |   |     |   |   |        |   |   |      |
| 7. Gender of household head                   | Categorical                | As is from survey database                                                                                                                                                                                                                                                                                                                                                                                                                                                                                                                                                                                                                                                                                                                                                                                                                                                                                                   |     |     |          |    |   |     |   |   |        |   |   |      |
| 8. Education of household head                | Categorical                | As is from survey database                                                                                                                                                                                                                                                                                                                                                                                                                                                                                                                                                                                                                                                                                                                                                                                                                                                                                                   |     |     |          |    |   |     |   |   |        |   |   |      |
| 9. Positive perceptions about regular LPG use | Continuous and Categorical | <p>Detailed in section SI3. When a categorical version of the positive perception score is used, we can't use the quantile data as the 3rd quantile and maximum value are the same. So, after review of the decile data, we manually decided on the following:</p> <table border="1"> <thead> <tr> <th>Min</th><th>Max</th><th>Category</th></tr> </thead> <tbody> <tr> <td>-5</td><td>2</td><td>Low</td></tr> <tr> <td>3</td><td>3</td><td>Medium</td></tr> <tr> <td>4</td><td>5</td><td>High</td></tr> </tbody> </table>                                                                                                                                                                                                                                                                                                                                                                                                   | Min | Max | Category | -5 | 2 | Low | 3 | 3 | Medium | 4 | 5 | High |
| Min                                           | Max                        | Category                                                                                                                                                                                                                                                                                                                                                                                                                                                                                                                                                                                                                                                                                                                                                                                                                                                                                                                     |     |     |          |    |   |     |   |   |        |   |   |      |
| -5                                            | 2                          | Low                                                                                                                                                                                                                                                                                                                                                                                                                                                                                                                                                                                                                                                                                                                                                                                                                                                                                                                          |     |     |          |    |   |     |   |   |        |   |   |      |
| 3                                             | 3                          | Medium                                                                                                                                                                                                                                                                                                                                                                                                                                                                                                                                                                                                                                                                                                                                                                                                                                                                                                                       |     |     |          |    |   |     |   |   |        |   |   |      |
| 4                                             | 5                          | High                                                                                                                                                                                                                                                                                                                                                                                                                                                                                                                                                                                                                                                                                                                                                                                                                                                                                                                         |     |     |          |    |   |     |   |   |        |   |   |      |

|                                             |                            |                                                                                                                                                                                                                                                                                                                                                                                                                                                                                                                                                               |
|---------------------------------------------|----------------------------|---------------------------------------------------------------------------------------------------------------------------------------------------------------------------------------------------------------------------------------------------------------------------------------------------------------------------------------------------------------------------------------------------------------------------------------------------------------------------------------------------------------------------------------------------------------|
| 10. Negative perceptions of regular LPG use | Continuous and Categorical | Detailed in section SI3. When a categorical version of the negative perception score is used, we categorize the 1st to 3rd quantile range as “Medium”. Lower and higher values beyond the range are categorized as “Small” and “High” respectively.                                                                                                                                                                                                                                                                                                           |
| 11. No. of burners in LPG stove             | Continuous and Categorical | As is from the survey database. When a categorical version of the burner size is used, we categorize them as “Single”, “Double”, & “Triple or more”                                                                                                                                                                                                                                                                                                                                                                                                           |
| 12. Urban or Rural                          | Categorical                | As is from survey database                                                                                                                                                                                                                                                                                                                                                                                                                                                                                                                                    |
| 13. Convenience to access LPG fuel          | Categorical                | <p>Respondents chose from the following options:</p> <ol style="list-style-type: none"> <li>1 Home delivered by LPG supplier</li> <li>2 Send the cylinder with someone else: PAYS NO transportation charge</li> <li>3 Send the cylinder with someone else: PAYS A transportation charge</li> <li>4 Travels less than 1 km</li> <li>5 Travels 1-3 km</li> <li>6 Travels 4-6 km</li> <li>7 Travels more than 6 km</li> </ol> <p>Those with options 1-4, were categorized as “Yes” and 5-7 with “No”. -88, -99 &amp; NA (missing) were coded as NA (missing)</p> |

Table SI6: Processing of thirteen variables identified as drivers and barriers

## Regression results

We have done two broad types of regression: binary logistic regression and ordered categorical regression as detailed below.

### A. Binary Logistic Regression

We conducted four rounds of generalized linear model-based logistic regression to test the influence of predictors on the outcome (success or failure) for each of the three transition choices: *uptake*, *main*, and *exclusive*.

#### Round 1: All-mixed

First, we conducted analyses with all (for uptake: 11, others: 13) factors as predictors for regression analysis. These are mixed models with both continuous (e.g.,



primary cook age), and categorical (e.g. primary cook gender) predictors. These *all-mix* models are called models 1, 5, and 9 for *uptake*, *main*, and *exclusive* respectively.

## Round 2: Significant-mixed

Second, we only selected the significant ( $p < 0.05$ ) factors for an updated estimate of their influence to re-run the regression analysis. In other words, we removed all the predictors with non-significant results. These *significant-mix* models are called models 2, 6, and 10 for *uptake*, *main*, and *exclusive* respectively. For these models, we then ran the full battery of tests to check how well the underlying assumptions for the binary logistic regression models hold true. The seven assumptions are detailed below in Table SI07. In the case of if an independent variable is statistically significant (i.e.,  $p \leq 0.05$ ), it implies the presence of non-linearity between the independent variable and the logit of the outcome variable.

| Assumptions                                                                                                                       | Significant-mixed | Significant-categorical |
|-----------------------------------------------------------------------------------------------------------------------------------|-------------------|-------------------------|
| 1: One dependent variable that is dichotomous (Study design)                                                                      | Yes               | Yes                     |
| 2: One or more independent variables that are measured on either a continuous or nominal scale (Study design)                     | Yes               | Yes                     |
| 3. Independence of observations: Predictors and dependent variables should be mutually exclusive and exhaustive (Study design)    | Yes               | Yes                     |
| 4. Minimum of 50 cases per independent variable (Study implementation)                                                            | Yes               | Yes                     |
| 5. The linear relationship between the continuous independent variables and the log-odds of the dependent variable (Study result) | Partial           | Yes                     |
| 6. No multicollinearity; occurs when two or more independent variables are highly correlated with each other.                     | Yes               | Yes                     |
| 7. No significant outliers, high leverage points, or highly influential points.                                                   | Partial           | Yes                     |

Table SI07: Regression assumption tests

We find that the underlying assumption of the linear relationship between continuous predictor variables and the logit of the outcome was not fully satisfied for all

three models 2,6, & 10. In the Box-Tidwell test, if an independent variable is statistically significant (i.e.,  $p \leq 0.05$ ), it implies the presence of non-linearity between the independent variable and the logit of the outcome variable. We found 2/4, 2/5, and 2/3 continuous variables for *uptake*, *main*, and *exclusive* respectively failed to meet this assumption. We also found 1 influential outlier datapoint for *uptake* (model 2) and no influential outlier datapoint for *main*, and *exclusive* transition choices.

### Round 3: All-categorical

Third, we converted all continuous variables into three categories and re-ran the analyses. The three categories are interquartile range (IQR: medium), <IQR as low, and >IQR: high. We manually adjusted the category cutoff when the 3rd quartile and max were identical in a couple of cases. These *all-categorical* models are called models 3, 7, and 11 for *uptake*, *main*, and *exclusive* respectively.

### Round 4: Significant-categorical

Finally, we only selected the significant ( $p < 0.05$ ) factors for an updated estimate of their influence to re-run the regression analysis. In other words, we removed all the categorical predictors with non-significant results. If the results were significant for one level but not for the other, we removed the predictor. For example, Primary Cook: Middle Age (vs. Young) as a predictor variable for main is significant, but Primary Cook: Old (vs. Young) was not significant. So, we dropped Primary Cook Age (categorical) in this round. These *significant-categorical* models are called models 4, 8, and 12 for *uptake*, *main*, and *exclusive* respectively. Again, for these models, we then ran the full battery of tests to check how well the underlying assumptions for the binary logistic regression models hold true (Table SI07). They have satisfied all assumptions when applicable. For example, we did not run the Box-Tidwell test as there were no more continuous predictors. The binary logistic regression results for *uptake*, *main*, and *exclusive* transition choices are shown in Tables SI8, SI9, and SI10 respectively. The tables were created using the *stargazer* package in R platform (Hlavac, 2022).

|                                              | Binary Logistic Regression for LPG Uptake               |                      |                      |                      |
|----------------------------------------------|---------------------------------------------------------|----------------------|----------------------|----------------------|
|                                              | LPG Uptake (Binary dependent variable): Yes (1), No (0) |                      |                      |                      |
|                                              | Model 1                                                 | Model 2              | Model 3              | Model 4              |
| Wealth Index Score                           | 0.510***<br>(0.024)                                     | 0.509***<br>(0.024)  |                      |                      |
| Wealth Index: MiddleClass (vs. Poor)         |                                                         |                      | 1.723***<br>(0.215)  | 1.736***<br>(0.214)  |
| Wealth Index: Rich (vs. Poor)                |                                                         |                      | 3.314***<br>(0.223)  | 3.337***<br>(0.222)  |
| Primary Cook Age                             | 0.005<br>(0.005)                                        |                      |                      |                      |
| Primary Cook: Middle Age (vs. Young)         |                                                         |                      | 0.028<br>(0.103)     |                      |
| Primary Cook: Old (vs. Young)                |                                                         |                      | -0.149<br>(0.145)    |                      |
| Primary Cook: Male (vs. Female)              | -0.041<br>(0.148)                                       |                      | 0.198<br>(0.146)     |                      |
| Primary Cook HigherEducation: Yes (vs. No)   | 0.593***<br>(0.120)                                     | 0.549***<br>(0.115)  | 0.652***<br>(0.115)  | 0.689***<br>(0.110)  |
| Household Head Age                           | -0.028***<br>(0.004)                                    | -0.025***<br>(0.003) |                      |                      |
| Household Head: Middle Age (vs. Young)       |                                                         |                      | -0.421***<br>(0.109) | -0.435***<br>(0.096) |
| Household Head: Old (vs. Young)              |                                                         |                      | -0.727***<br>(0.149) | -0.833***<br>(0.120) |
| Household Head = Female? Yes                 | -0.119<br>(0.097)                                       |                      | 0.019<br>(0.094)     |                      |
| Household Head HigherEducation: Yes (vs. No) | 0.237**<br>(0.115)                                      | 0.284**<br>(0.110)   | 0.438***<br>(0.110)  | 0.421***<br>(0.107)  |
| Family Size                                  | -0.355***<br>(0.032)                                    | -0.349***<br>(0.029) |                      |                      |
| Family Size: Medium (vs. Small)              |                                                         |                      | -0.418***<br>(0.101) | -0.439***<br>(0.093) |
| Family Size: Large (vs. Small)               |                                                         |                      | -1.130***<br>(0.133) | -1.157***<br>(0.124) |
| Location: Urban (vs. Rural)                  | 0.840***<br>(0.088)                                     | 0.832***<br>(0.087)  | 0.918***<br>(0.086)  | 0.916***<br>(0.085)  |
| Positive perception Score                    | 0.034<br>(0.136)                                        |                      |                      |                      |
| Positive perception: Middle (vs. Small)      |                                                         |                      | 0.256**<br>(0.105)   |                      |
| Positive perception: High (vs. Small)        |                                                         |                      | -0.047<br>(0.107)    |                      |
| Negative perception Score                    | 1.320***<br>(0.083)                                     | 1.322***<br>(0.083)  |                      |                      |
| Negative perception: Medium (vs. Small)      |                                                         |                      | 0.540***<br>(0.108)  | 0.576***<br>(0.107)  |
| Negative perception: High (vs. Small)        |                                                         |                      | 1.612***<br>(0.112)  | 1.651***<br>(0.112)  |
| Observations                                 | 4,604                                                   | 4,604                | 4,604                | 4,604                |
| Log Likelihood                               | -1,875.566                                              | -1,876.836           | -1,967.094           | -1,975.259           |
| Akaike Inf. Crit.                            | 3,775.132                                               | 3,769.673            | 3,970.187            | 3,974.518            |
| Bayesian Inf. Crit.                          | 3852.3                                                  | 3821.2               | 4086                 | 4051.7               |
| McFadden pseduo R <sup>2</sup>               | 0.398                                                   | 0.397                | 0.368                | 0.366                |
| Hosmer Lemeshow goodness of fit- p value     | 0.15                                                    | 0.721                | 0.073                | 0.162                |

Note:

\*p<0.1; \*\*p<0.05; \*\*\*p<0.01

Table SI8: Binary Logistic regression for *uptake* transition choice outcome with eleven predictors

|                                              | Binary Logistic Regression for LPG Use as main fuel      |                      |                      |                      |
|----------------------------------------------|----------------------------------------------------------|----------------------|----------------------|----------------------|
|                                              | LPG mainuse (Binary dependent variable): Yes (1), No (0) |                      |                      |                      |
|                                              | Model 5                                                  | Model 6              | Model 7              | Model 8              |
| Wealth Index Score                           | 0.113***<br>(0.030)                                      | 0.115***<br>(0.030)  |                      |                      |
| Wealth Index: MiddleClass (vs. Poor)         |                                                          |                      | -1.407**<br>(0.645)  |                      |
| Wealth Index: Rich (vs. Poor)                |                                                          |                      | -0.966<br>(0.650)    |                      |
| Primary Cook Age                             | -0.005<br>(0.007)                                        |                      |                      |                      |
| Primary Cook: Middle Age (vs. Young)         |                                                          |                      | -0.341**<br>(0.164)  |                      |
| Primary Cook: Old (vs. Young)                |                                                          |                      | -0.377<br>(0.238)    |                      |
| Primary Cook: Male (vs. Female)              | 1.067***<br>(0.271)                                      | 1.090***<br>(0.259)  | 1.141***<br>(0.271)  | 1.125***<br>(0.248)  |
| Primary Cook HigherEducation: Yes (vs. No)   | 0.499***<br>(0.170)                                      | 0.539***<br>(0.139)  | 0.550***<br>(0.169)  | 0.726***<br>(0.129)  |
| Household Head Age                           | -0.025***<br>(0.007)                                     | -0.029***<br>(0.005) |                      |                      |
| Household Head: Middle Age (vs. Young)       |                                                          |                      | -0.024<br>(0.172)    |                      |
| Household Head: Old (vs. Young)              |                                                          |                      | -0.935***<br>(0.236) |                      |
| Household Head = Female? Yes                 | -0.098<br>(0.146)                                        |                      | -0.070<br>(0.148)    |                      |
| Household Head HigherEducation: Yes (vs. No) | 0.031<br>(0.168)                                         |                      | 0.183<br>(0.167)     |                      |
| Family Size                                  | -0.394***<br>(0.052)                                     | -0.375***<br>(0.048) |                      |                      |
| Family Size: Medium (vs. Small)              |                                                          |                      | -0.998***<br>(0.165) | -0.896***<br>(0.145) |
| Family Size: Large (vs. Small)               |                                                          |                      | -1.582***<br>(0.220) | -1.528***<br>(0.191) |
| Convenient Access to Fuel: Yes (vs. No)      | 0.064<br>(0.139)                                         |                      | 0.058<br>(0.140)     |                      |
| Location: Urban (vs. Rural)                  | 0.487***<br>(0.148)                                      | 0.504***<br>(0.147)  | 0.541***<br>(0.150)  | 0.484***<br>(0.140)  |
| Positive perception Score                    | 0.295<br>(0.237)                                         |                      |                      |                      |
| Positive perception: Middle (vs. Small)      |                                                          |                      | 0.102<br>(0.166)     |                      |
| Positive perception: High (vs. Small)        |                                                          |                      | 0.013<br>(0.177)     |                      |
| Negative perception Score                    | 0.904***<br>(0.125)                                      | 0.883***<br>(0.124)  |                      |                      |
| Negative perception: Medium (vs. Small)      |                                                          |                      | 0.766***<br>(0.195)  | 0.731***<br>(0.182)  |
| Negative perception: High (vs. Small)        |                                                          |                      | 1.286***<br>(0.191)  | 1.272***<br>(0.179)  |
| Number of LPG Burners                        | 0.463***<br>(0.065)                                      | 0.460***<br>(0.064)  |                      |                      |
| LPG Burners: Double (vs. Single)             |                                                          |                      | 0.857***<br>(0.175)  | 0.884***<br>(0.166)  |
| LPG Burners: Triple(vs. Single)              |                                                          |                      | 1.291***<br>(0.169)  | 1.210***<br>(0.150)  |
| Observations                                 | 1,741                                                    | 1,762                | 1,741                | 1,788                |
| Log Likelihood                               | -784.066                                                 | -794.839             | -780.853             | -846.887             |
| Akaike Inf. Crit.                            | 1,596.132                                                | 1,607.678            | 1,603.706            | 1,713.774            |
| Bayesian Inf. Crit.                          | 1672.6                                                   | 1656.9               | 1718.4               | 1768.7               |
| McFadden pseduo R <sup>2</sup>               | 0.214                                                    | 0.213                | 0.218                | 0.18                 |
| Hosmer Lemeshow goodness of fit- p value     | 0.668                                                    | 0.592                | 0.877                | 0.553                |

Note: \* p<0.1; \*\* p<0.05; \*\*\* p<0.01  
Only LPG users are considered  
Perception questions around LPG use only answered by respondents who have seen/ operated LPG stove

Table SI9: Binary Logistic regression for *main* transition choice outcome with thirteen predictors

|                                              | Binary Logistic Regression for LPG Use as Exclusive Fuel                   |                      |                      |                      |
|----------------------------------------------|----------------------------------------------------------------------------|----------------------|----------------------|----------------------|
|                                              | LPG as exclusive cooking fuel (Binary dependent variable): Yes (1), No (0) |                      |                      |                      |
|                                              | Model 9                                                                    | Model 10             | Model 11             | Model 12             |
| Wealth Index Score                           | -0.085***<br>(0.027)                                                       | -0.078***<br>(0.023) |                      |                      |
| Wealth Index: MiddleClass (vs. Poor)         |                                                                            |                      | -0.156<br>(0.595)    |                      |
| Wealth Index: Rich (vs. Poor)                |                                                                            |                      | -0.779<br>(0.603)    |                      |
| Primary Cook Age                             | -0.011<br>(0.008)                                                          |                      |                      |                      |
| Primary Cook: Middle Age (vs. Young)         |                                                                            |                      | 0.001<br>(0.156)     |                      |
| Primary Cook: Old (vs. Young)                |                                                                            |                      | -0.174<br>(0.254)    |                      |
| Primary Cook: Male (vs. Female)              | 1.240***<br>(0.202)                                                        | 1.224***<br>(0.189)  | 1.273***<br>(0.197)  | 1.280***<br>(0.183)  |
| Primary Cook HigherEducation: Yes (vs. No)   | 0.259<br>(0.185)                                                           |                      | 0.304*<br>(0.182)    |                      |
| Household Head Age                           | 0.005<br>(0.008)                                                           |                      |                      |                      |
| Household Head: Middle Age (vs. Young)       |                                                                            |                      | 0.032<br>(0.165)     |                      |
| Household Head: Old (vs. Young)              |                                                                            |                      | -0.095<br>(0.269)    |                      |
| Household Head = Female? Yes                 | 0.353**<br>(0.152)                                                         | 0.328**<br>(0.140)   | 0.340**<br>(0.152)   | 0.330**<br>(0.138)   |
| Household Head HigherEducation: Yes (vs. No) | 0.437**<br>(0.188)                                                         | 0.633***<br>(0.129)  | 0.414**<br>(0.184)   | 0.579***<br>(0.123)  |
| Family Size                                  | -0.409***<br>(0.066)                                                       | -0.425***<br>(0.061) |                      |                      |
| Family Size: Medium (vs. Small)              |                                                                            |                      | -0.853***<br>(0.147) | -1.040***<br>(0.133) |
| Family Size: Large (vs. Small)               |                                                                            |                      | -1.424***<br>(0.271) | -1.543***<br>(0.237) |
| Convenient Access to Fuel: Yes (vs. No)      | -0.149<br>(0.141)                                                          |                      | -0.152<br>(0.142)    |                      |
| Location: Urban (vs. Rural)                  | 0.094<br>(0.160)                                                           |                      | 0.154<br>(0.163)     |                      |
| Positive perception Score                    | -0.353<br>(0.253)                                                          |                      |                      |                      |
| Positive perception: Middle (vs. Small)      |                                                                            |                      | -0.260<br>(0.169)    |                      |
| Positive perception: High (vs. Small)        |                                                                            |                      | -0.344*<br>(0.180)   |                      |
| Negative perception Score                    | 0.509***<br>(0.131)                                                        | 0.448***<br>(0.124)  |                      |                      |
| Negative perception: Medium (vs. Small)      |                                                                            |                      | -0.173<br>(0.248)    | -0.265<br>(0.231)    |
| Negative perception: High (vs. Small)        |                                                                            |                      | 0.330<br>(0.235)     | 0.173<br>(0.219)     |
| Number of LPG Burners                        | 0.011<br>(0.060)                                                           |                      |                      |                      |
| LPG Burners: Double (vs. Single)             |                                                                            |                      | 0.289*<br>(0.173)    |                      |
| LPG Burners: Triple(vs. Single)              |                                                                            |                      | 0.102<br>(0.161)     |                      |
| Observations                                 | 1,288                                                                      | 1,400                | 1,288                | 1,411                |
| Log Likelihood                               | -749.344                                                                   | -820.802             | -750.356             | -838.010             |
| Akaike Inf. Crit.                            | 1,526.689                                                                  | 1,655.604            | 1,542.713            | 1,692.020            |
| Bayesian Inf. Crit.                          | 1672.6                                                                     | 1656.9               | 1718.4               | 1768.7               |
| McFadden pseudo R <sup>2</sup>               | 0.214                                                                      | 0.213                | 0.218                | 0.18                 |
| Hosmer Lemeshow goodness of fit- p value     | 0.668                                                                      | 0.592                | 0.877                | 0.553                |

Note: \*p<0.1; \*\*p<0.05; \*\*\*p<0.01

Only main (primary/ exclusive) LPG users are considered

Perception questions around LPG use only answered by respondents who have seen/ operated LPG stove

211

212 Table SI10: Binary Logistic regression for *exclusive* transition choice outcome with thirteen predictors

213 Notably for *uptake*, two predictors of convenience to LPG fuel, and the number of  
214 burners were not used as they are discussed in the choice of predictors. Please note  
215 that sample size numbers can slightly vary as for each regression, any blank (missing)  
216 value in any factor leads to that entire respondent (observation) getting dropped.

217  
218 For *uptake*, we do not find any difference between model 2 and model 4 in terms  
219 of significant predictors- it shows that when continuous predictors are converted to  
220 categorical, it did not change the key results. For *main*, two predictors Household Head  
221 Age and Wealth Index Score that were statistically significant ( $p < 0.05$ ) in model 6 were  
222 dropped in model 8. The odds ratio for Household Head Age and Wealth Index Score  
223 were 0.97 and 1.12 respectively in model 6. For *exclusive*, two predictors Negative  
224 perception Score and Wealth Index Score that were statistically significant ( $p < 0.05$ ) in  
225 model 10 were dropped in model 12. The odds ratio for the Negative perception Score  
226 and Wealth Index Score were 1.56 and 0.92 respectively in model 10.

227  
228 We also conducted four tests for model fit assessment which are shown in the  
229 tables SI 8,9, and 10. One, McFadden pseudo-squared R which mirrors the adjusted R-  
230 squared in OLS by penalizing a model for including too many predictors. Values  
231 between 0.2 and 0.4 imply an excellent fit. Two, the Hosmer-Lemeshow test which is a  
232 statistical test for goodness of fit for the logistic regression model. Small p-values mean  
233 that the model is a poor fit. We also used Probabilistic model selection (or “information  
234 criteria”) which provides an analytical technique for scoring and choosing among  
235 candidate models. Three, we calculate the Akaike information criterion (AIC). AIC is  
236 used to compare different models and determine which one is the best fit for the data.  
237 Lower AIC values are better as AIC penalizes models that use more parameters. So if  
238 two models explain the same amount of variation, the one with fewer parameters will  
239 have a lower AIC score and will be the better-fit model. Four, we also calculate the  
240 Bayesian information criterion (BIC). Unlike the AIC, the BIC penalizes the model more  
241 for its complexity, meaning that more complex models will have a worse (larger) score  
242 and will, in turn, be less likely to be selected.

253           We select model 2 over model 4 for *uptake* as it scores better in 4 out of 4  
254 goodness of fit tests though it was partially successful in two underlying assumptions  
255 tests. (Both models have a similar statistically significant set of predictors wherein the  
256 continuous predictors in model 2 were cut into three levels of categorical predictors).  
257

258           We select model 6 over model 8 for *main* as it scores better in 4 out of 4  
259 goodness of fit tests though it was partially successful in one underlying assumptions  
260 test. Notably, model 6 has a better fit in spite of having two additional continuous  
261 predictors that were not significant in model 8 when converted to categorical predictors  
262 (for both levels).  
263

264           We select model 10 over model 12 for *exclusive* as it scores better in 4 out of 4  
265 goodness of fit tests though it was partially successful in one underlying assumptions  
266 test. Notably, model 10 has a better fit in spite of having two additional continuous  
267 predictors that were not significant in model 12 when converted to categorical predictors  
268 (for both levels).  
269

270           Hence, in the main paper, we present the findings from models 2, 6, and 10 in  
271 Figure 4, but present the mixed model results in Table SI11.  
272

|                                          | Transition Choice Outcome: Binary Logistic Regression |                    |                                      |                    |                                           |                                                        |
|------------------------------------------|-------------------------------------------------------|--------------------|--------------------------------------|--------------------|-------------------------------------------|--------------------------------------------------------|
|                                          | LPG Uptake:<br>Yes (1), No (0)                        |                    | LPG as Main Fuel:<br>Yes (1), No (0) |                    | LPG as Exclusive Fuel:<br>Yes (1), No (0) |                                                        |
|                                          | All                                                   | Significant        | All                                  | Significant        | All                                       | Significant                                            |
| Wealth Index Score                       | 0.51***<br>(0.02)                                     | 0.51***<br>(0.02)  | 0.11***<br>(0.03)                    | 0.11***<br>(0.03)  | -0.09***<br>(0.03)                        | -0.08***<br>(0.02)                                     |
| Primary Cook Age                         | 0.01<br>(0.00)                                        |                    | -0.00<br>(0.01)                      |                    | -0.01<br>(0.01)                           |                                                        |
| Primary Cook = Male? Yes                 | -0.04<br>(0.15)                                       |                    | 1.07***<br>(0.27)                    | 1.09***<br>(0.26)  | 1.24***<br>(0.20)                         | 1.22***<br>(0.19)                                      |
| Primary Cook Higher Education? Yes       | 0.59***<br>(0.12)                                     | 0.55***<br>(0.12)  | 0.50***<br>(0.17)                    | 0.54***<br>(0.14)  | 0.26<br>(0.19)                            |                                                        |
| Household Head Age                       | -0.03***<br>(0.00)                                    | -0.02***<br>(0.00) | -0.03***<br>(0.01)                   | -0.03***<br>(0.00) | 0.00<br>(0.01)                            |                                                        |
| Household Head = Female? Yes             | -0.12<br>(0.10)                                       |                    | -0.10<br>(0.15)                      |                    | 0.35**<br>(0.15)                          | 0.33**<br>(0.14)                                       |
| Household Head Higher Education? Yes     | 0.24**<br>(0.11)                                      | 0.28**<br>(0.11)   | 0.03<br>(0.17)                       |                    | 0.44**<br>(0.19)                          | 0.63***<br>(0.13)                                      |
| Family Size                              | -0.35***<br>(0.03)                                    | -0.35***<br>(0.03) | -0.39***<br>(0.05)                   | -0.38***<br>(0.05) | -0.41***<br>(0.07)                        | -0.43***<br>(0.06)                                     |
| Convenient LPG Fuel Access? Yes          |                                                       |                    | 0.06<br>(0.14)                       |                    | -0.15<br>(0.14)                           |                                                        |
| Location= Urban? Yes                     | 0.84***<br>(0.09)                                     | 0.83***<br>(0.09)  | 0.49***<br>(0.15)                    | 0.50***<br>(0.15)  | 0.09<br>(0.16)                            |                                                        |
| Positive perception Score                | 0.03<br>(0.14)                                        |                    | 0.29<br>(0.24)                       |                    | -0.35<br>(0.25)                           |                                                        |
| Negative perception Score                | 1.32***<br>(0.08)                                     | 1.32***<br>(0.08)  | 0.90***<br>(0.13)                    | 0.88***<br>(0.12)  | 0.51***<br>(0.13)                         | 0.45***<br>(0.12)                                      |
| Number of burners in LPG stove           |                                                       |                    | 0.46***<br>(0.06)                    | 0.46***<br>(0.06)  | 0.01<br>(0.06)                            |                                                        |
| Observations                             | 4,604                                                 | 4,604              | 1,741                                | 1,762              | 1,288                                     | 1,400                                                  |
| Log Likelihood                           | -1,875.57                                             | -1,876.84          | -784.07                              | -794.84            | -749.34                                   | -820.80                                                |
| Akaike Inf. Crit.                        | 3,775.13                                              | 3,769.67           | 1,596.13                             | 1,607.68           | 1,526.69                                  | 1,655.60                                               |
| Bayesian Inf. Crit.                      | 3852.3                                                | 3821.2             | 1672.6                               | 1656.9             | 1598.9                                    | 1692.3                                                 |
| McFadden pseudo R <sup>2</sup>           | 0.398                                                 | 0.397              | 0.214                                | 0.213              | 0.159                                     | 0.153                                                  |
| Hosmer Lemeshow goodness of fit- p value | 0.15                                                  | 0.721              | 0.668                                | 0.592              | 0.178                                     | 0.839                                                  |
| Note:                                    |                                                       |                    |                                      |                    |                                           | * p<0.1; ** p<0.05; *** p<0.01                         |
|                                          |                                                       |                    |                                      |                    |                                           | Main fuel implies LPG use as primary or exclusive fuel |

Table S111: Summary of binary logistic regression for all three transition nodes using a mix of categorical and continuous variables



We also present the graphical plot (Figure SI12) and summary (Table SI13) of binary logistic regression for all three transition nodes using only categorical variables that satisfy all regression assumptions completely. The figures were created using the *dotwhisker* package in R platform (Solt et al., 2022).

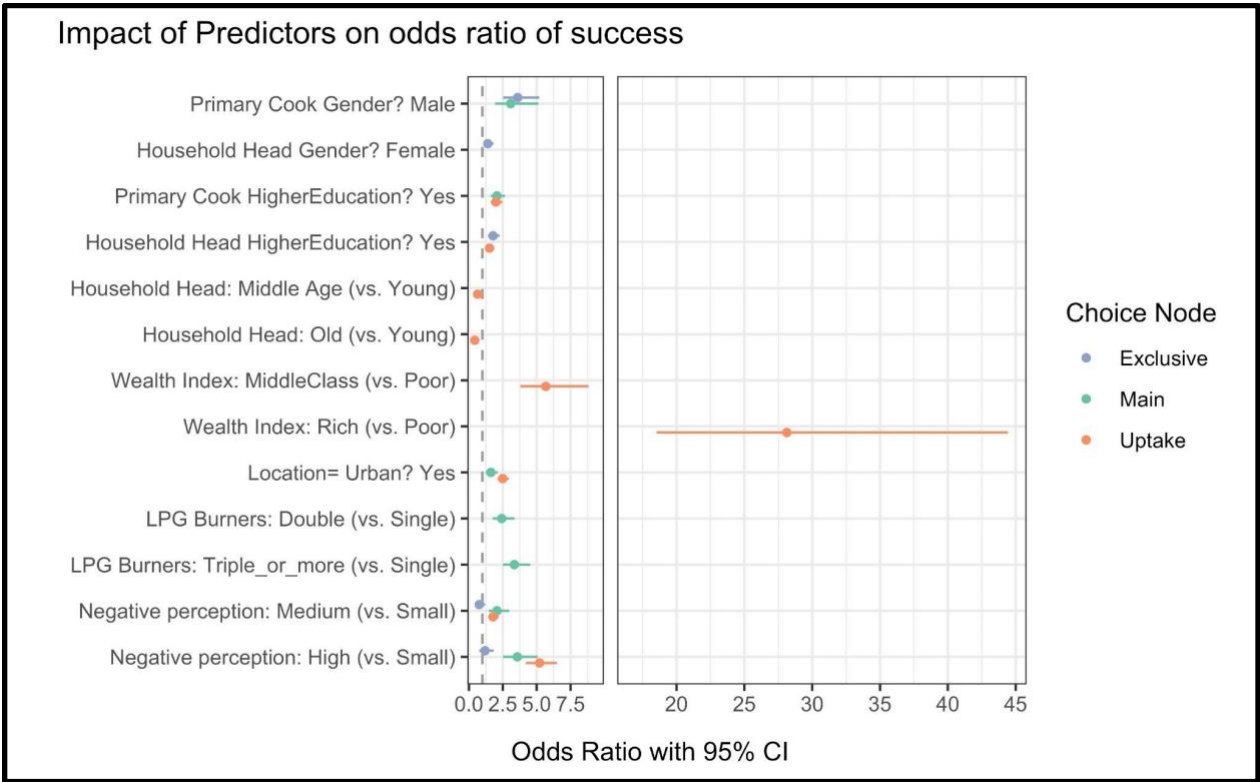

Figure SI12: Coefficient plot for all the three processes (ref: Figure 1) of LPG transition only showing predictors that were found to be statistically significant for the three choices.  $\exp(\text{Estimate})$  provides the odds value of the factor using the exponential of the estimate (coefficient value) of the binary logistic regression. The circles represent the odds value while the line shows the 95% confidence interval around the odds value.

|                                                                                             | Transition Choice Outcome: Binary Logistic Regression |                    |                    |                    |                        |                    |
|---------------------------------------------------------------------------------------------|-------------------------------------------------------|--------------------|--------------------|--------------------|------------------------|--------------------|
|                                                                                             | LPG Uptake:                                           |                    | LPG as Main Fuel:  |                    | LPG as Exclusive Fuel: |                    |
|                                                                                             | Yes (1), No (0)                                       |                    | Yes (1), No (0)    |                    | Yes (1), No (0)        |                    |
|                                                                                             | All                                                   | Significant        | All                | Significant        | All                    | Significant        |
| Wealth Index: MiddleClass (vs. Poor)                                                        | 1.72***<br>(0.21)                                     | 1.74***<br>(0.21)  | -1.41**<br>(0.65)  |                    | -0.16<br>(0.59)        |                    |
| Wealth Index: Rich (vs. Poor)                                                               | 3.31***<br>(0.22)                                     | 3.34***<br>(0.22)  | -0.97<br>(0.65)    |                    | -0.78<br>(0.60)        |                    |
| Primary Cook: Middle Age (vs. Young)                                                        | 0.03<br>(0.10)                                        |                    | -0.34**<br>(0.16)  |                    | 0.00<br>(0.16)         |                    |
| Primary Cook: Old (vs. Young)                                                               | -0.15<br>(0.14)                                       |                    | -0.38<br>(0.24)    |                    | -0.17<br>(0.25)        |                    |
| Primary Cook: Male (vs. Female)                                                             | 0.20<br>(0.15)                                        |                    | 1.14***<br>(0.27)  | 1.12***<br>(0.25)  | 1.27***<br>(0.20)      | 1.28***<br>(0.18)  |
| Primary Cook HigherEducation: Yes (vs. No)                                                  | 0.65***<br>(0.11)                                     | 0.69***<br>(0.11)  | 0.55***<br>(0.17)  | 0.73***<br>(0.13)  | 0.30*<br>(0.18)        |                    |
| Household Head: Middle Age (vs. Young)                                                      | -0.42***<br>(0.11)                                    | -0.44***<br>(0.10) | -0.02<br>(0.17)    |                    | 0.03<br>(0.16)         |                    |
| Household Head: Old (vs. Young)                                                             | -0.73***<br>(0.15)                                    | -0.83***<br>(0.12) | -0.94***<br>(0.24) |                    | -0.10<br>(0.27)        |                    |
| Household Head = Female? Yes                                                                | 0.02<br>(0.09)                                        |                    | -0.07<br>(0.15)    |                    | 0.34**<br>(0.15)       | 0.33**<br>(0.14)   |
| Household Head HigherEducation: Yes (vs. No)                                                | 0.44***<br>(0.11)                                     | 0.42***<br>(0.11)  | 0.18<br>(0.17)     |                    | 0.41**<br>(0.18)       | 0.58***<br>(0.12)  |
| Family Size: Medium (vs. Small)                                                             | -0.42***<br>(0.10)                                    | -0.44***<br>(0.09) | -1.00***<br>(0.17) | -0.90***<br>(0.14) | -0.85***<br>(0.15)     | -1.04***<br>(0.13) |
| Family Size: Large (vs. Small)                                                              | -1.13***<br>(0.13)                                    | -1.16***<br>(0.12) | -1.58***<br>(0.22) | -1.53***<br>(0.19) | -1.42***<br>(0.27)     | -1.54***<br>(0.24) |
| Convenient Access to Fuel: Yes (vs. No)                                                     |                                                       |                    | 0.06<br>(0.14)     |                    | -0.15<br>(0.14)        |                    |
| Location: Urban (vs. Rural)                                                                 | 0.92***<br>(0.09)                                     | 0.92***<br>(0.08)  | 0.54***<br>(0.15)  | 0.48***<br>(0.14)  | 0.15<br>(0.16)         |                    |
| Positive perception: Middle (vs. Small)                                                     | 0.26**<br>(0.11)                                      |                    | 0.10<br>(0.17)     |                    | -0.26<br>(0.17)        |                    |
| Positive perception: High (vs. Small)                                                       | -0.05<br>(0.11)                                       |                    | 0.01<br>(0.18)     |                    | -0.34*<br>(0.18)       |                    |
| Negative perception: Medium (vs. Small)                                                     | 0.54***<br>(0.11)                                     | 0.58***<br>(0.11)  | 0.77***<br>(0.19)  | 0.73***<br>(0.18)  | -0.17<br>(0.25)        | -0.27<br>(0.23)    |
| Negative perception: High (vs. Small)                                                       | 1.61***<br>(0.11)                                     | 1.65***<br>(0.11)  | 1.29***<br>(0.19)  | 1.27***<br>(0.18)  | 0.33<br>(0.23)         | 0.17<br>(0.22)     |
| LPG Burners: Double (vs. Single)                                                            |                                                       |                    | 0.86***<br>(0.18)  | 0.88***<br>(0.17)  | 0.29*<br>(0.17)        |                    |
| LPG Burners: Triple(vs. Single)                                                             |                                                       |                    | 1.29***<br>(0.17)  | 1.21***<br>(0.15)  | 0.10<br>(0.16)         |                    |
| Observations                                                                                | 4,604                                                 | 4,604              | 1,741              | 1,788              | 1,288                  | 1,411              |
| Log Likelihood                                                                              | -1,967.09                                             | -1,975.26          | -780.85            | -846.89            | -750.36                | -838.01            |
| Akaike Inf. Crit.                                                                           | 3,970.19                                              | 3,974.52           | 1,603.71           | 1,713.77           | 1,542.71               | 1,692.02           |
| Bayesian Inf. Crit.                                                                         | 4086                                                  | 4051.7             | 1718.4             | 1768.7             | 1651.1                 | 1734               |
| McFadden pseduo R <sup>2</sup>                                                              | 0.368                                                 | 0.366              | 0.218              | 0.18               | 0.157                  | 0.142              |
| Hosmer Lemeshow goodness of fit- p value                                                    | 0.073                                                 | 0.162              | 0.877              | 0.553              | 0.218                  | 0.982              |
| Note: *p<0.1; **p<0.05; ***p<0.01<br>Main fuel implies LPG use as primary or exclusive fuel |                                                       |                    |                    |                    |                        |                    |

Table SI13: Summary of binary logistic regression for all three transition nodes using only categorical variables

# SI5: Inspection of the independent variables and the outcome of LPG transition choices

In addition to wealth index score and urbanicity, we have plotted the association (and statistical results) among the other eleven predictor variables and LPG transition choice outcomes as shown here. The figures were created using the *ggstatsplot* package in R platform (Patil, 2021).

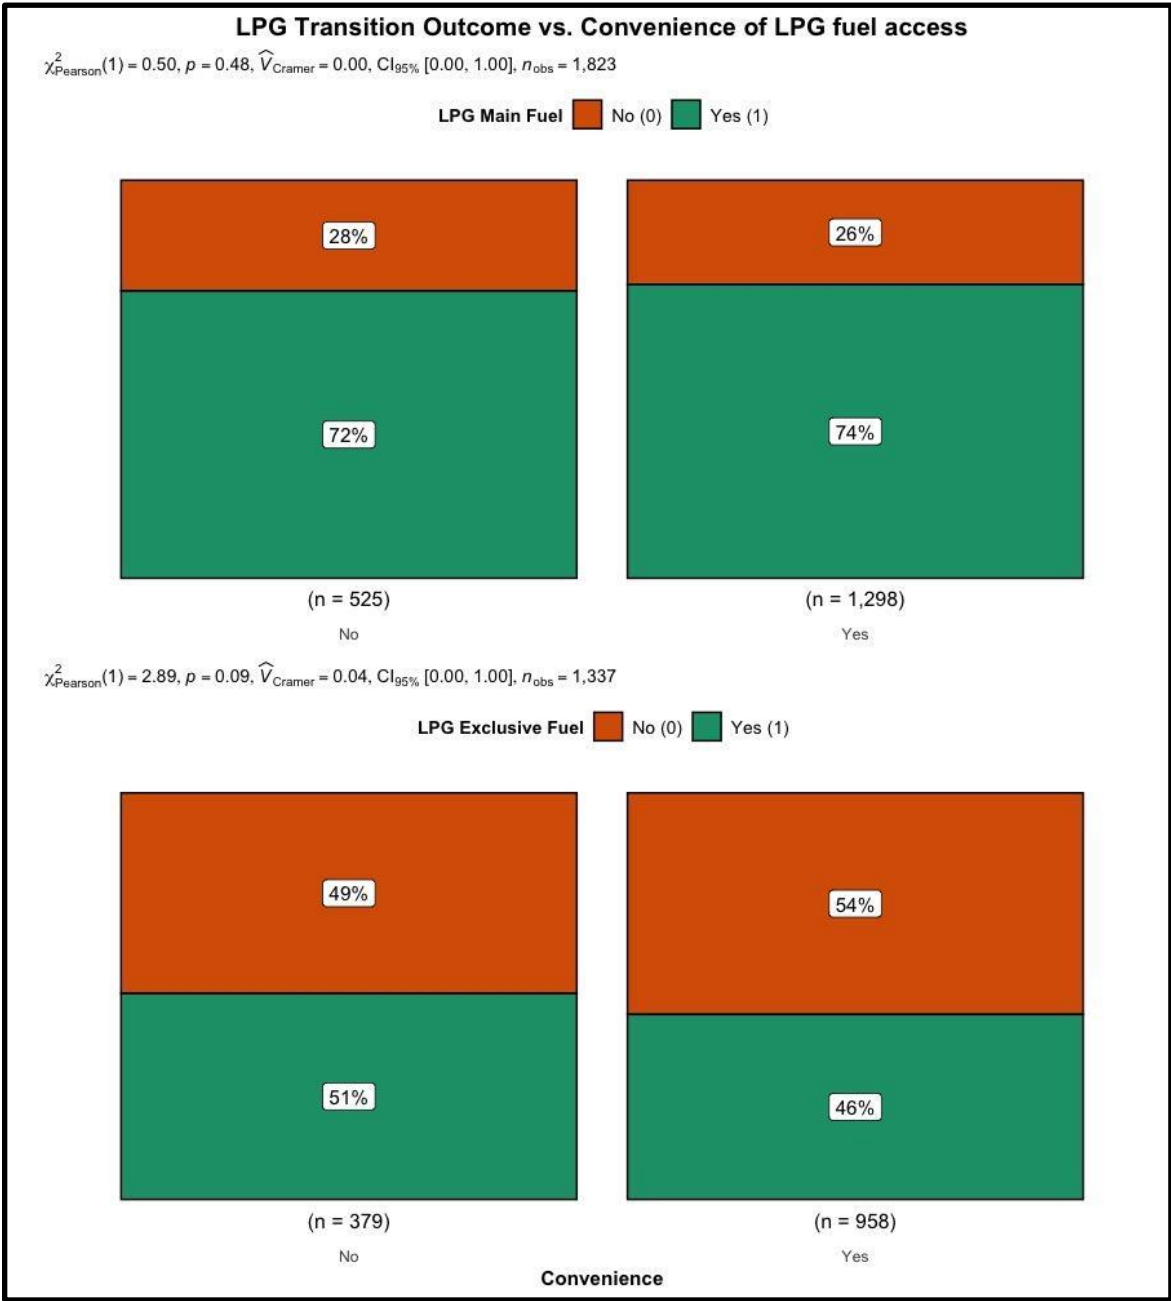

Figure SI14: Association between convenience to access LPG fuel and LPG transition choice outcomes. Only LPG users are considered.

305

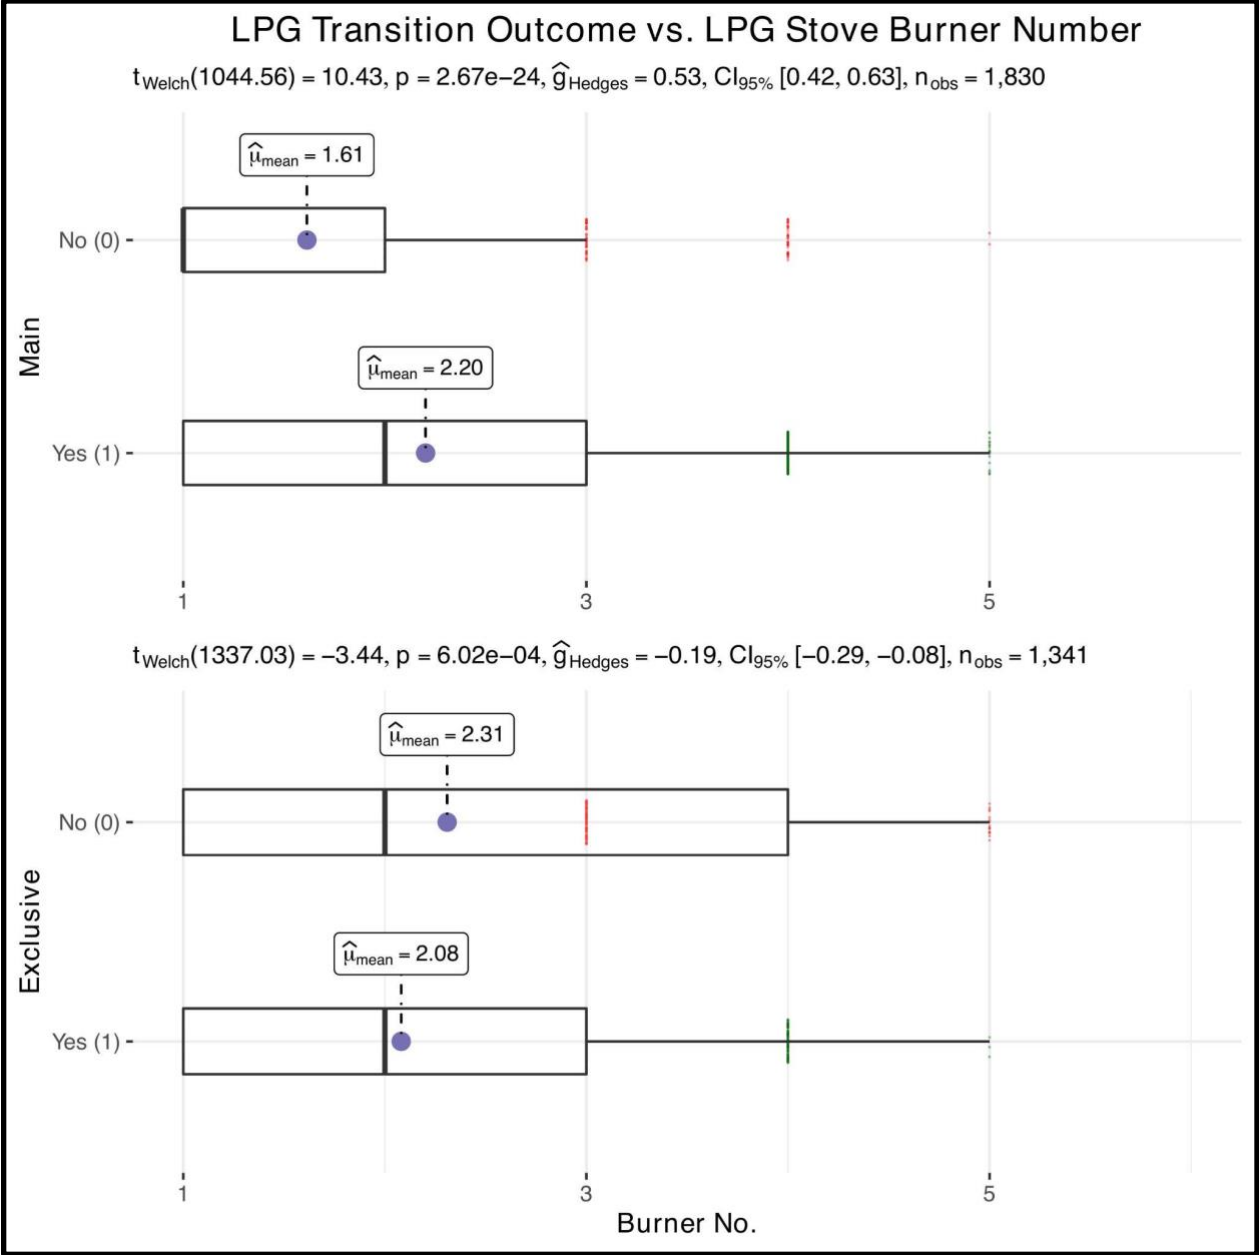

Figure SI15: Association between the number of burners in LPG stove and LPG transition choice outcomes. Only considered for LPG users.

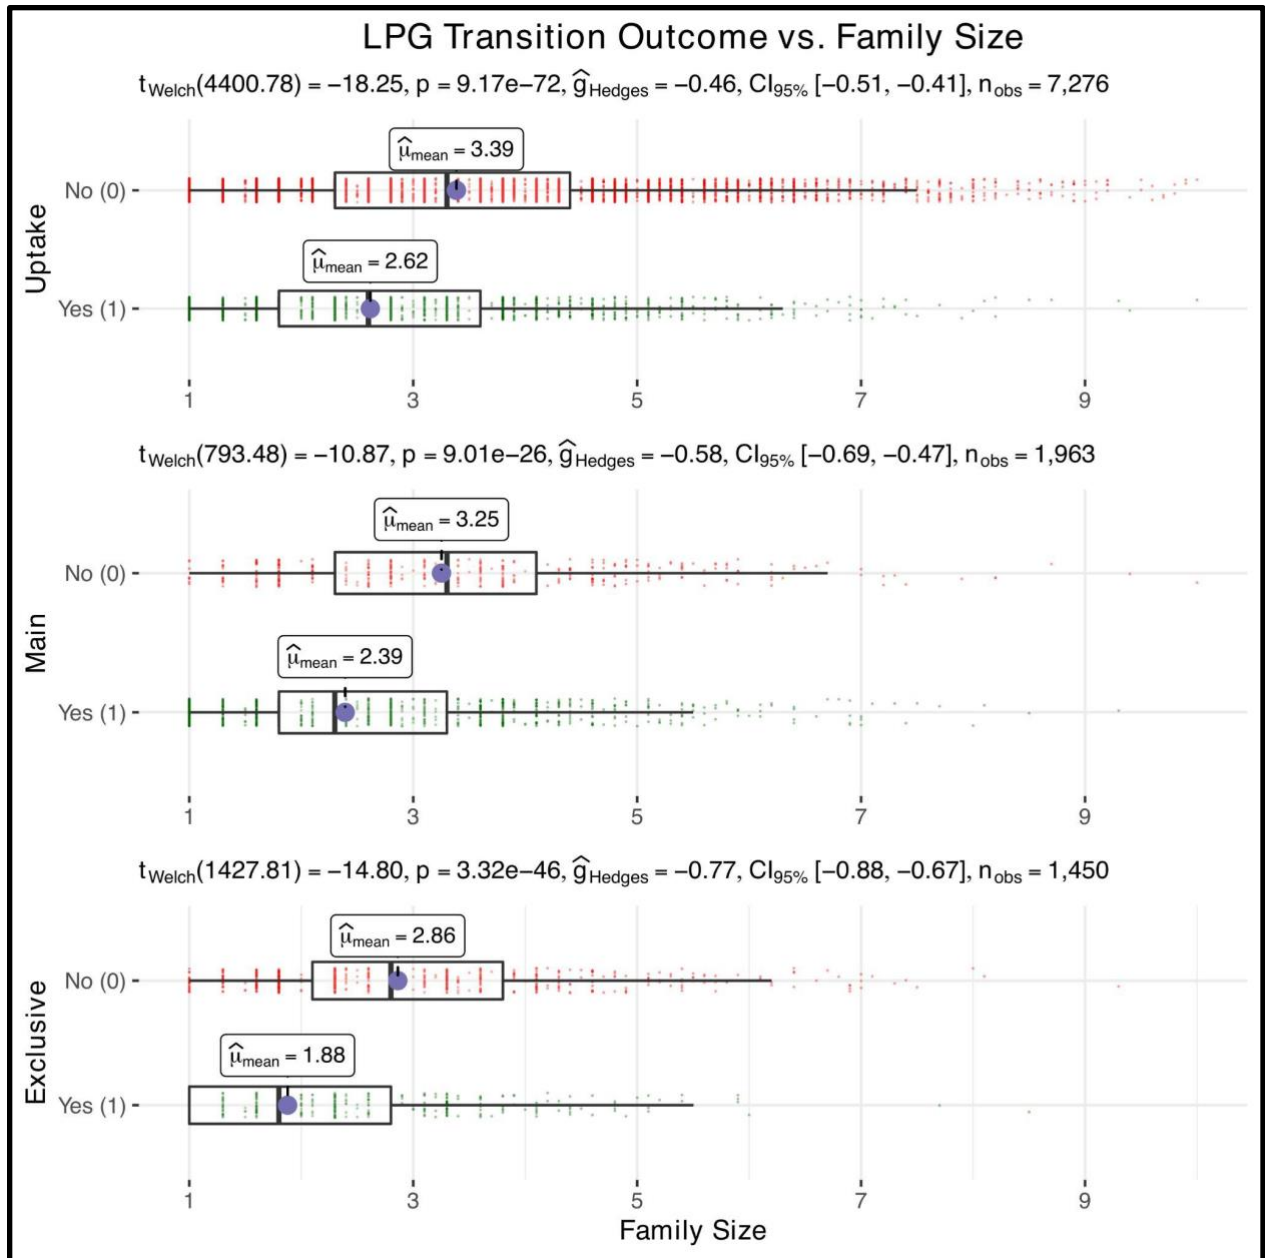

Figure SI16: Association between family size (standard adult) and LPG transition choice outcomes

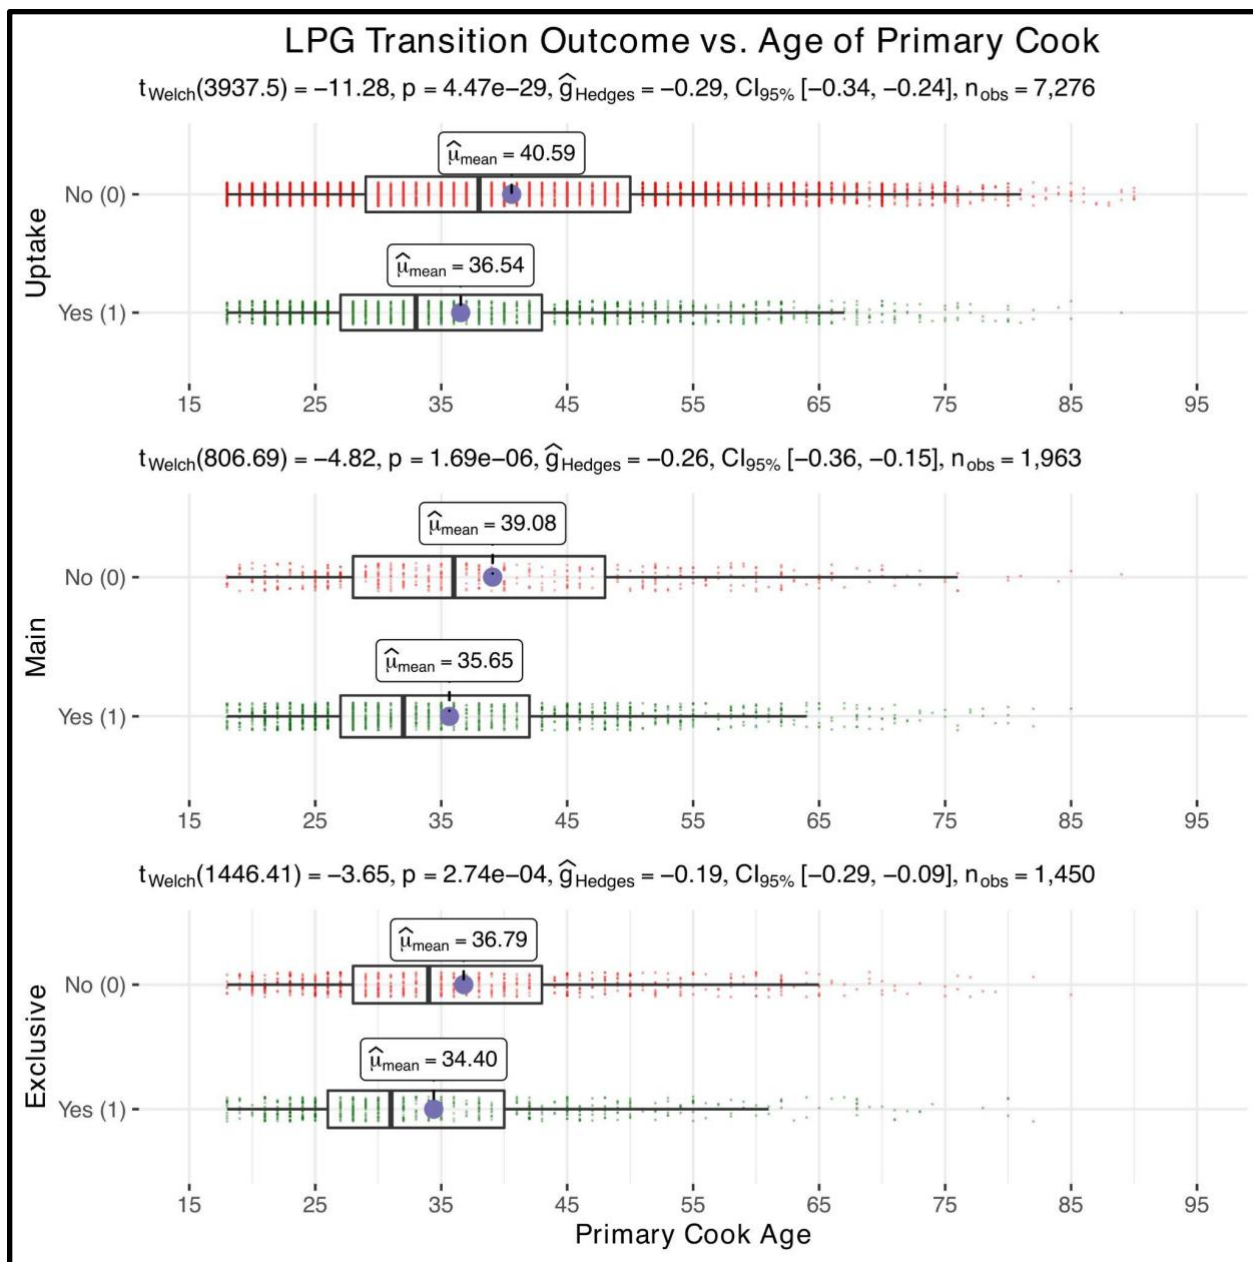

Figure SI17: Association between primary cook age and LPG transition choice outcomes

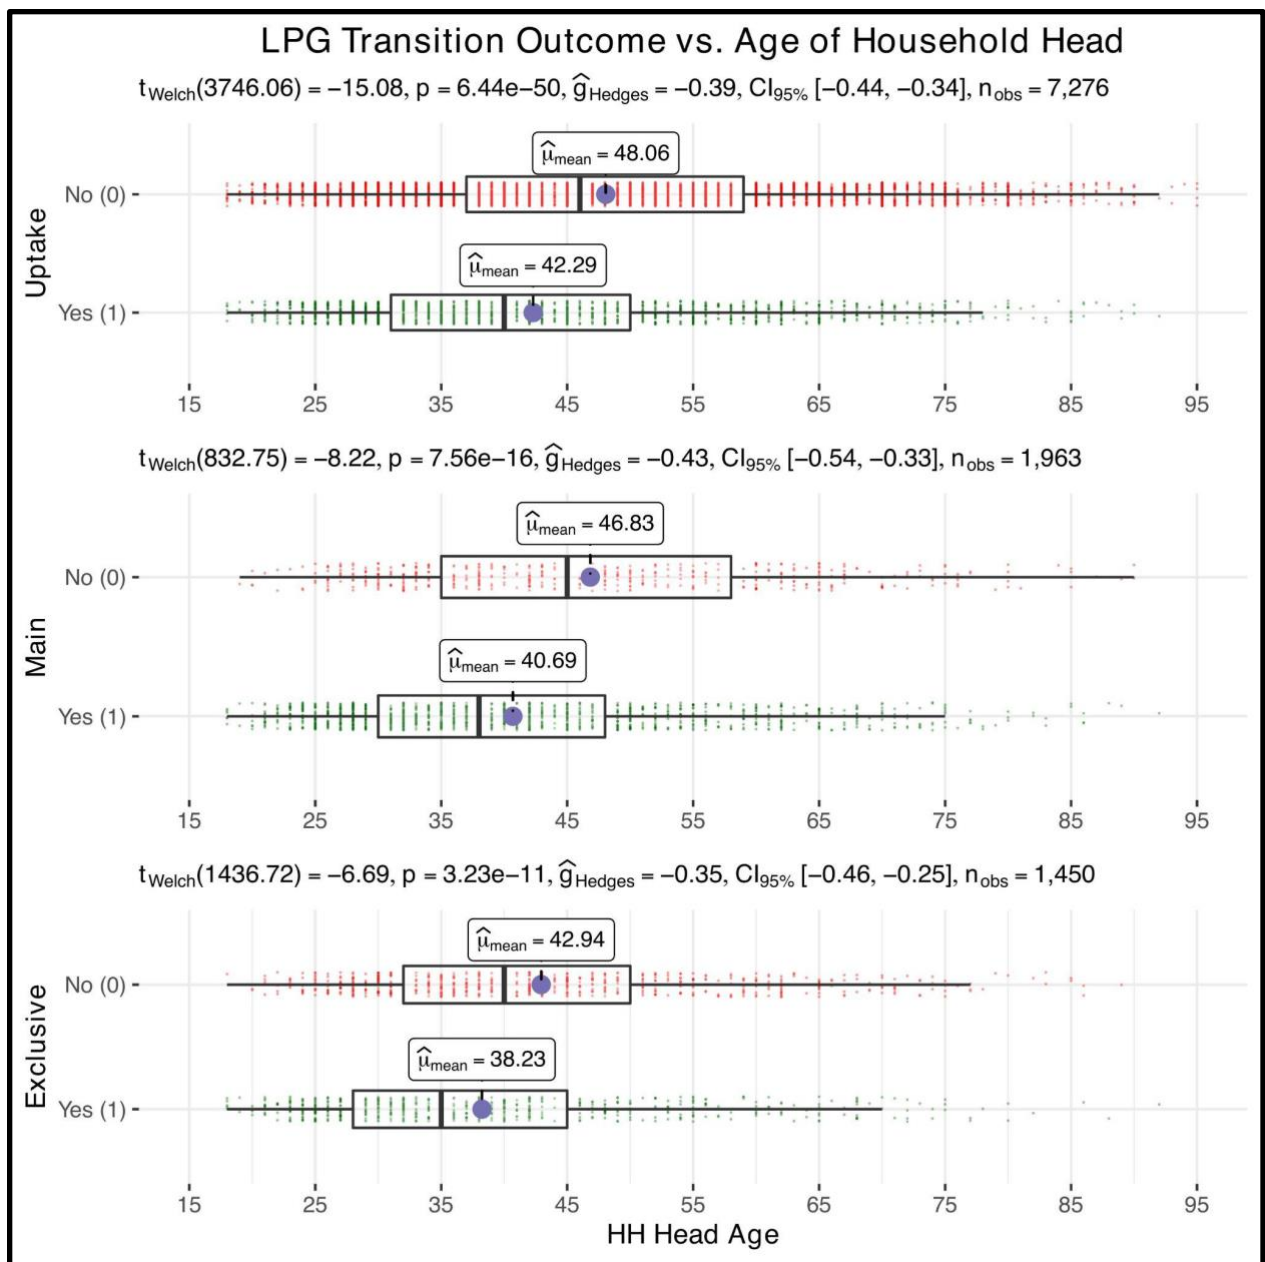

Figure SI18: Association between Household Head Age and LPG transition choice outcomes

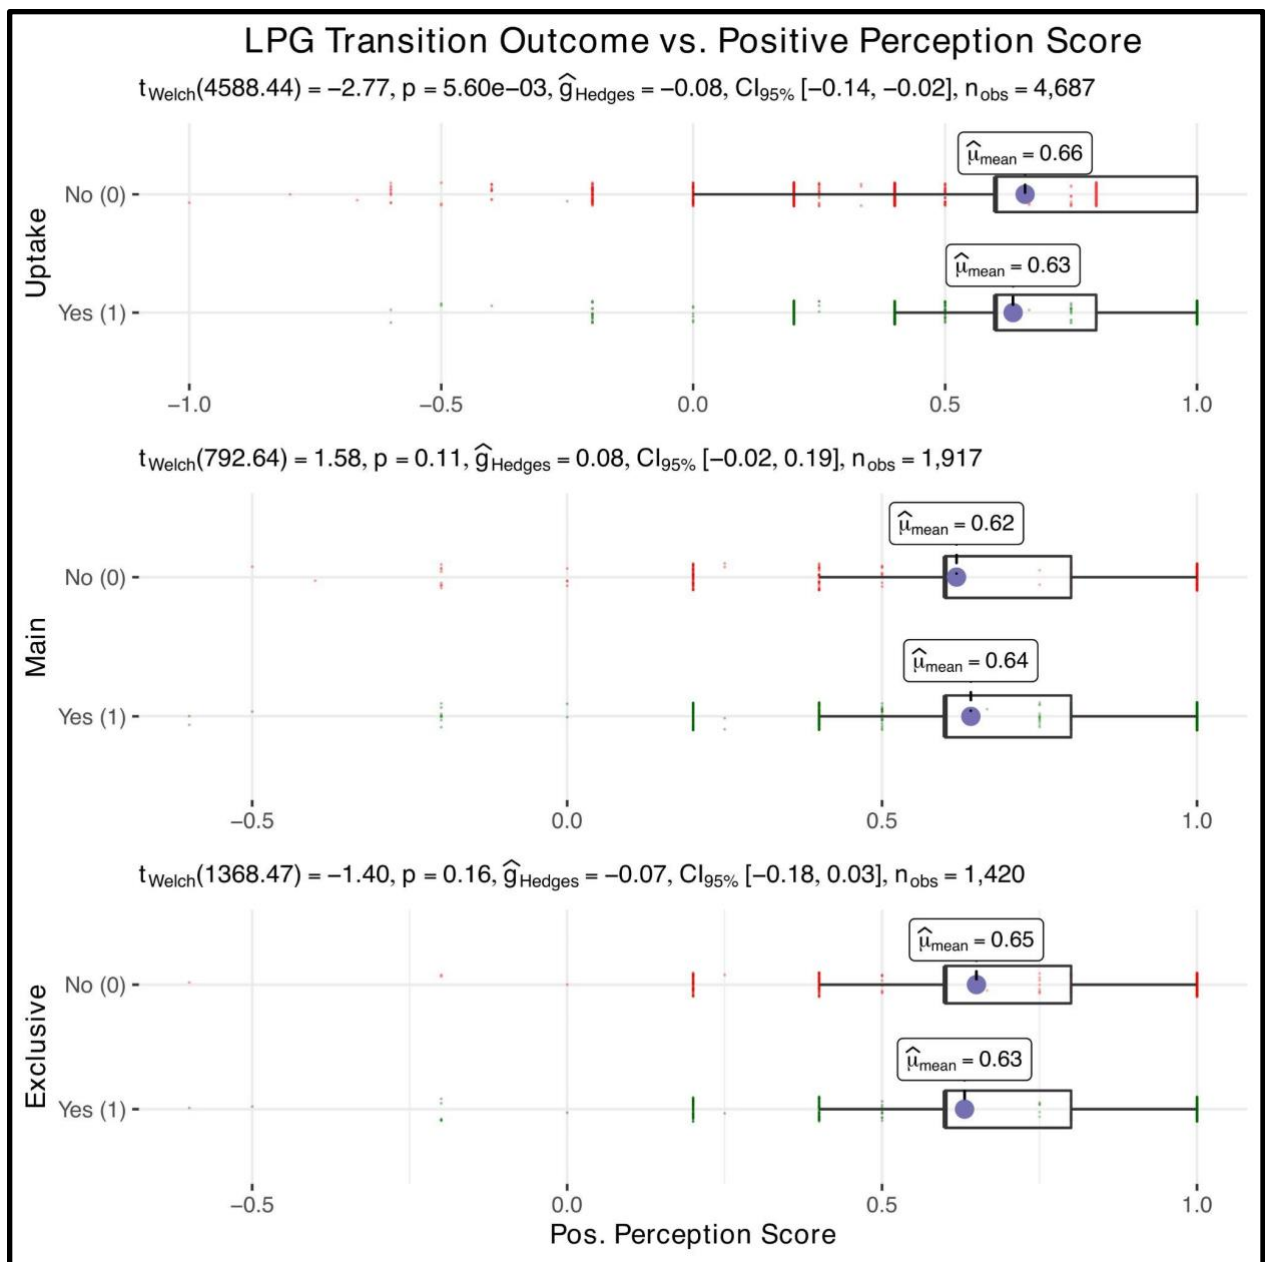

Figure SI19: Association between positive perception score and LPG transition choice outcomes



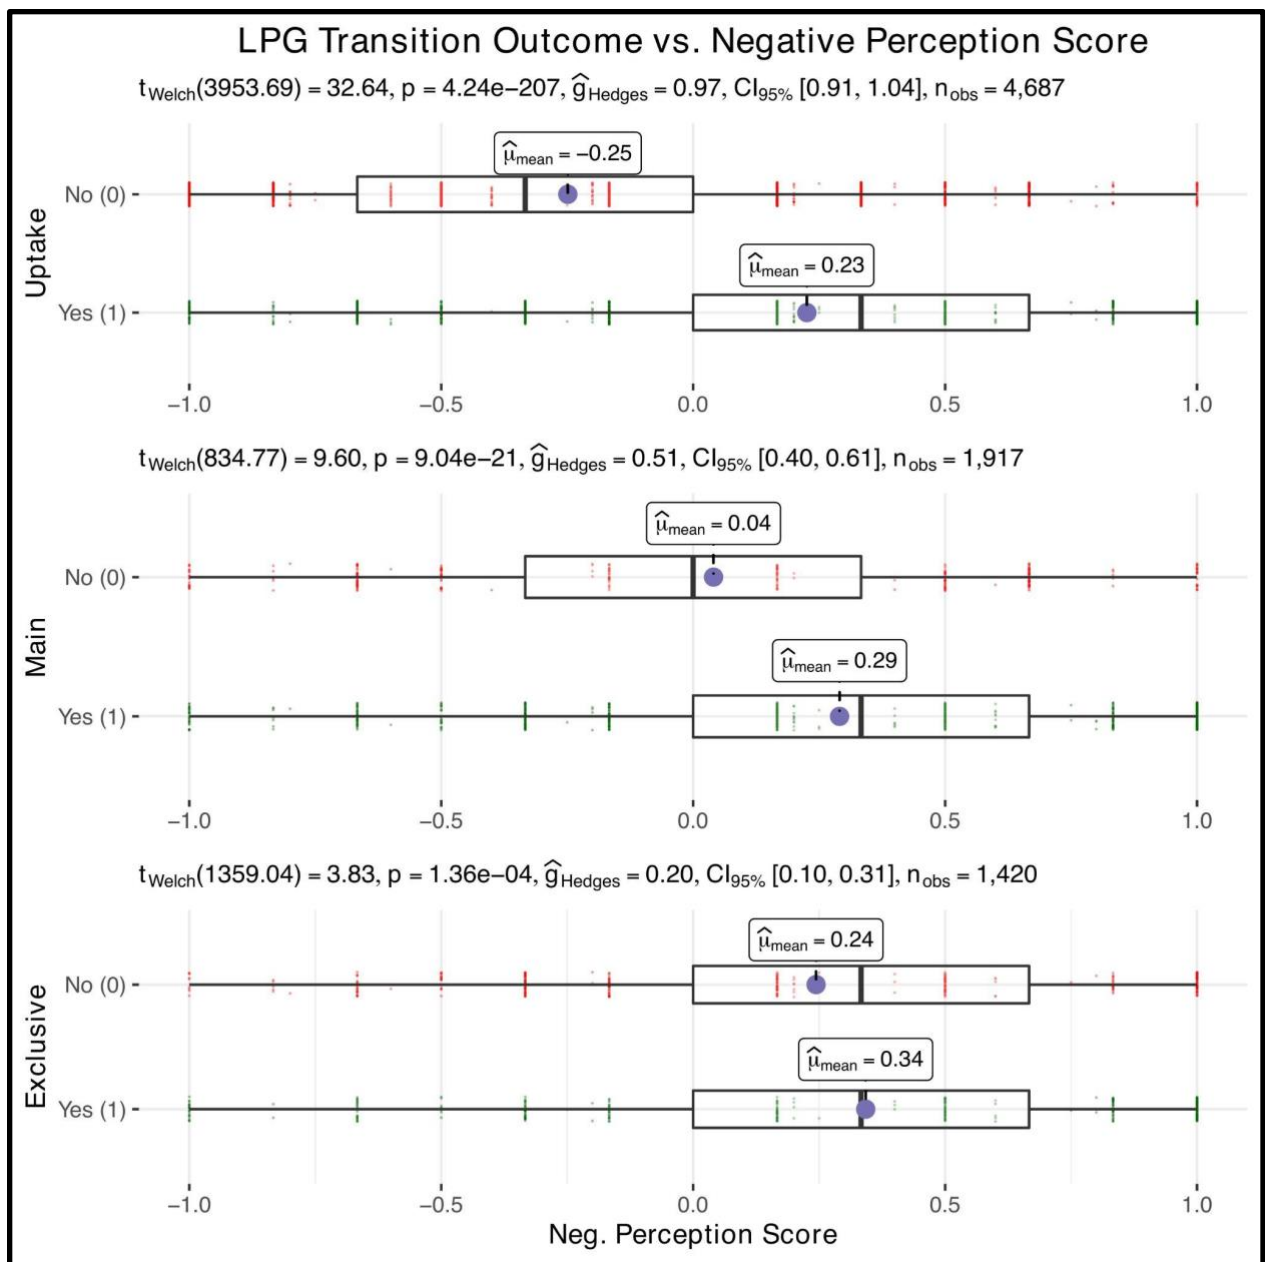

Figure SI20: Association between negative perception score and LPG transition choice outcomes

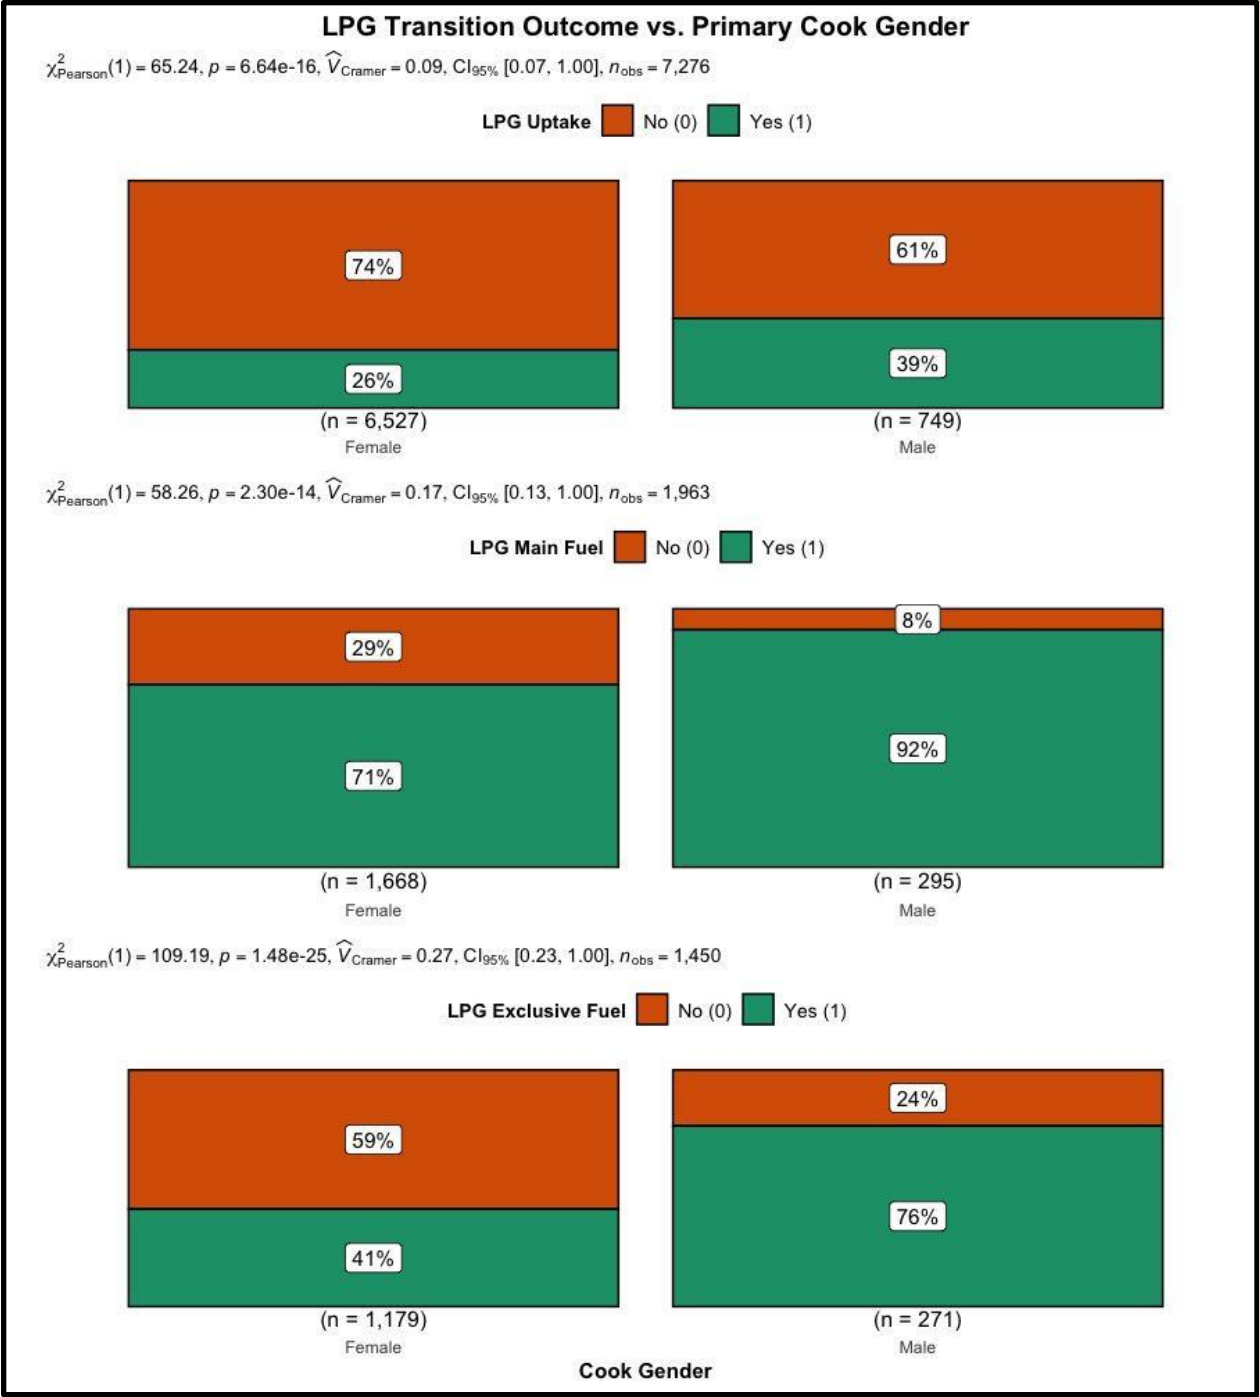

Figure SI21: Association between primary cook gender and LPG transition choice outcomes

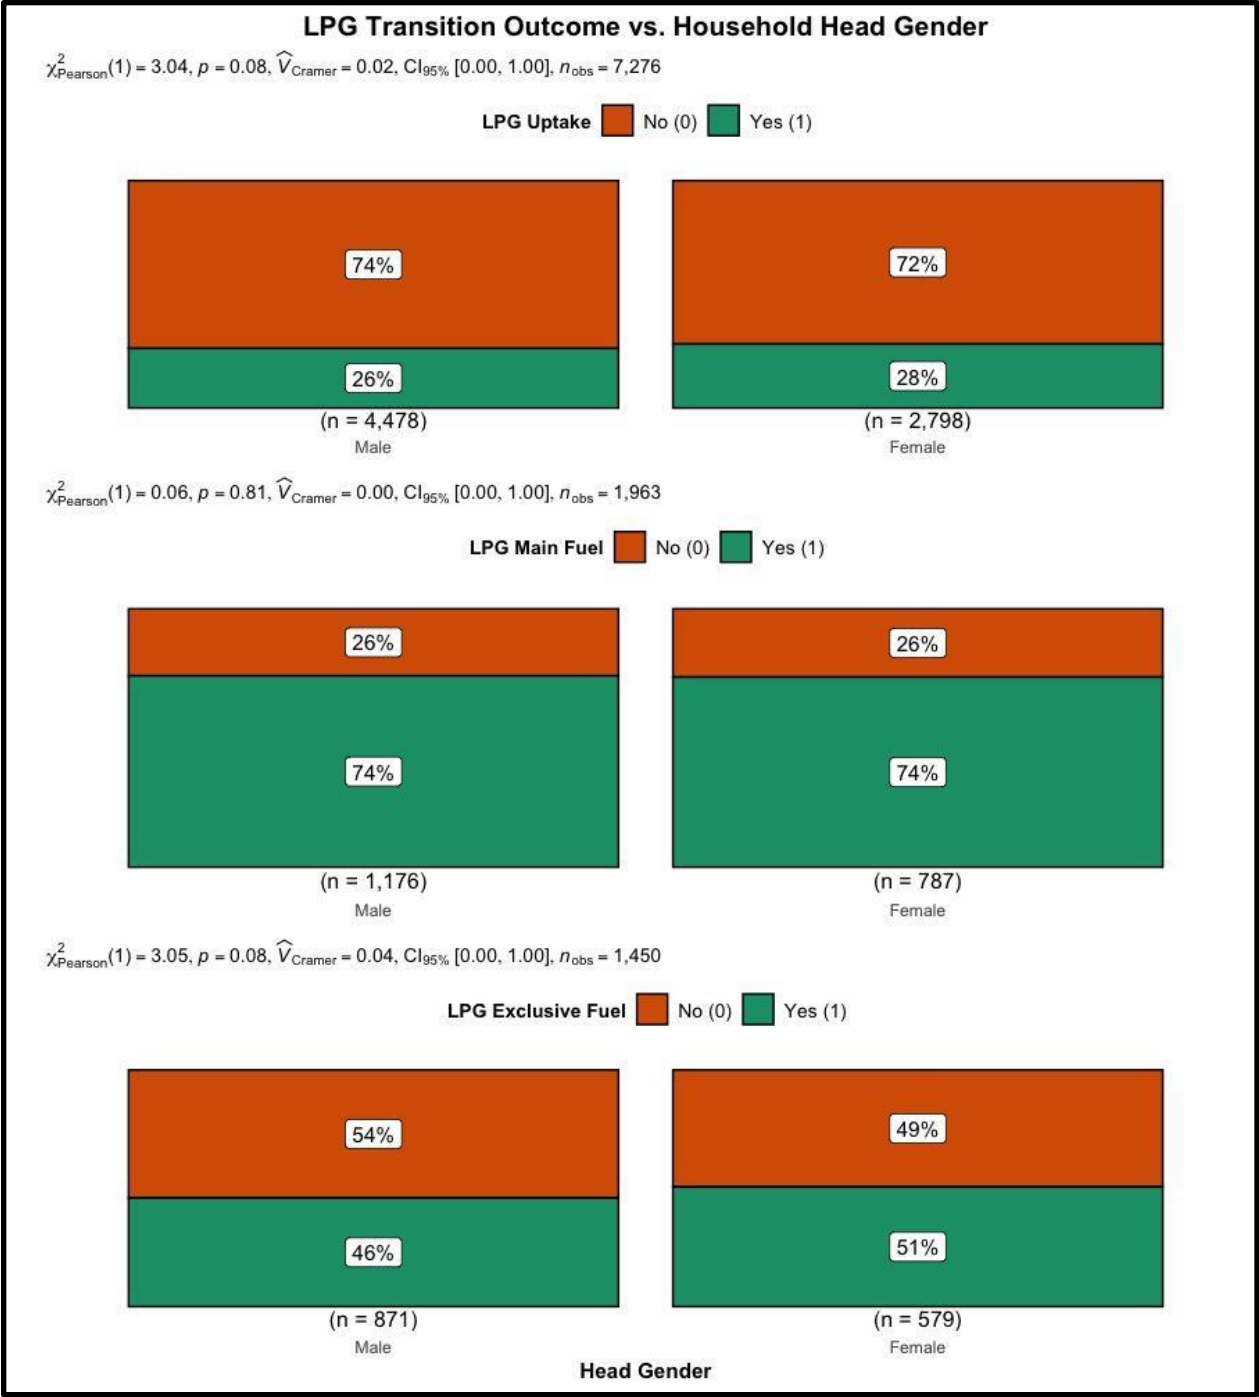

Figure SI22: Association between household head gender and LPG transition choice outcomes

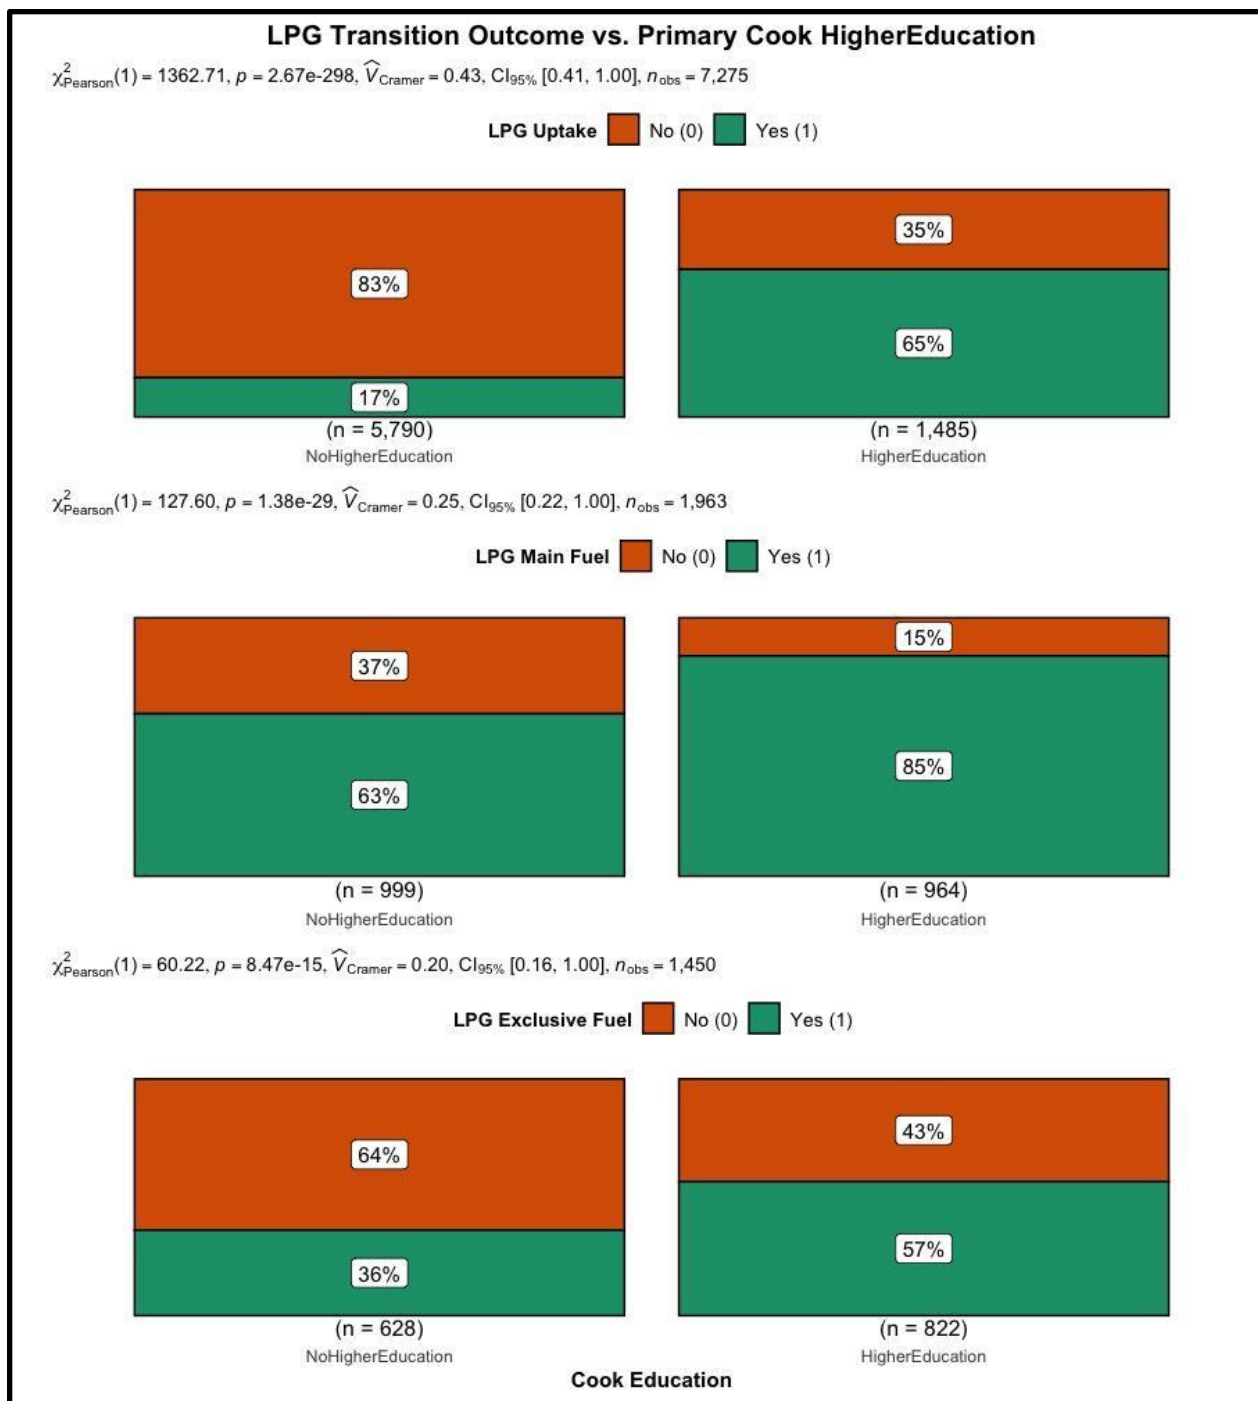

Figure SI23: Association between primary cook higher education and LPG transition choice outcomes

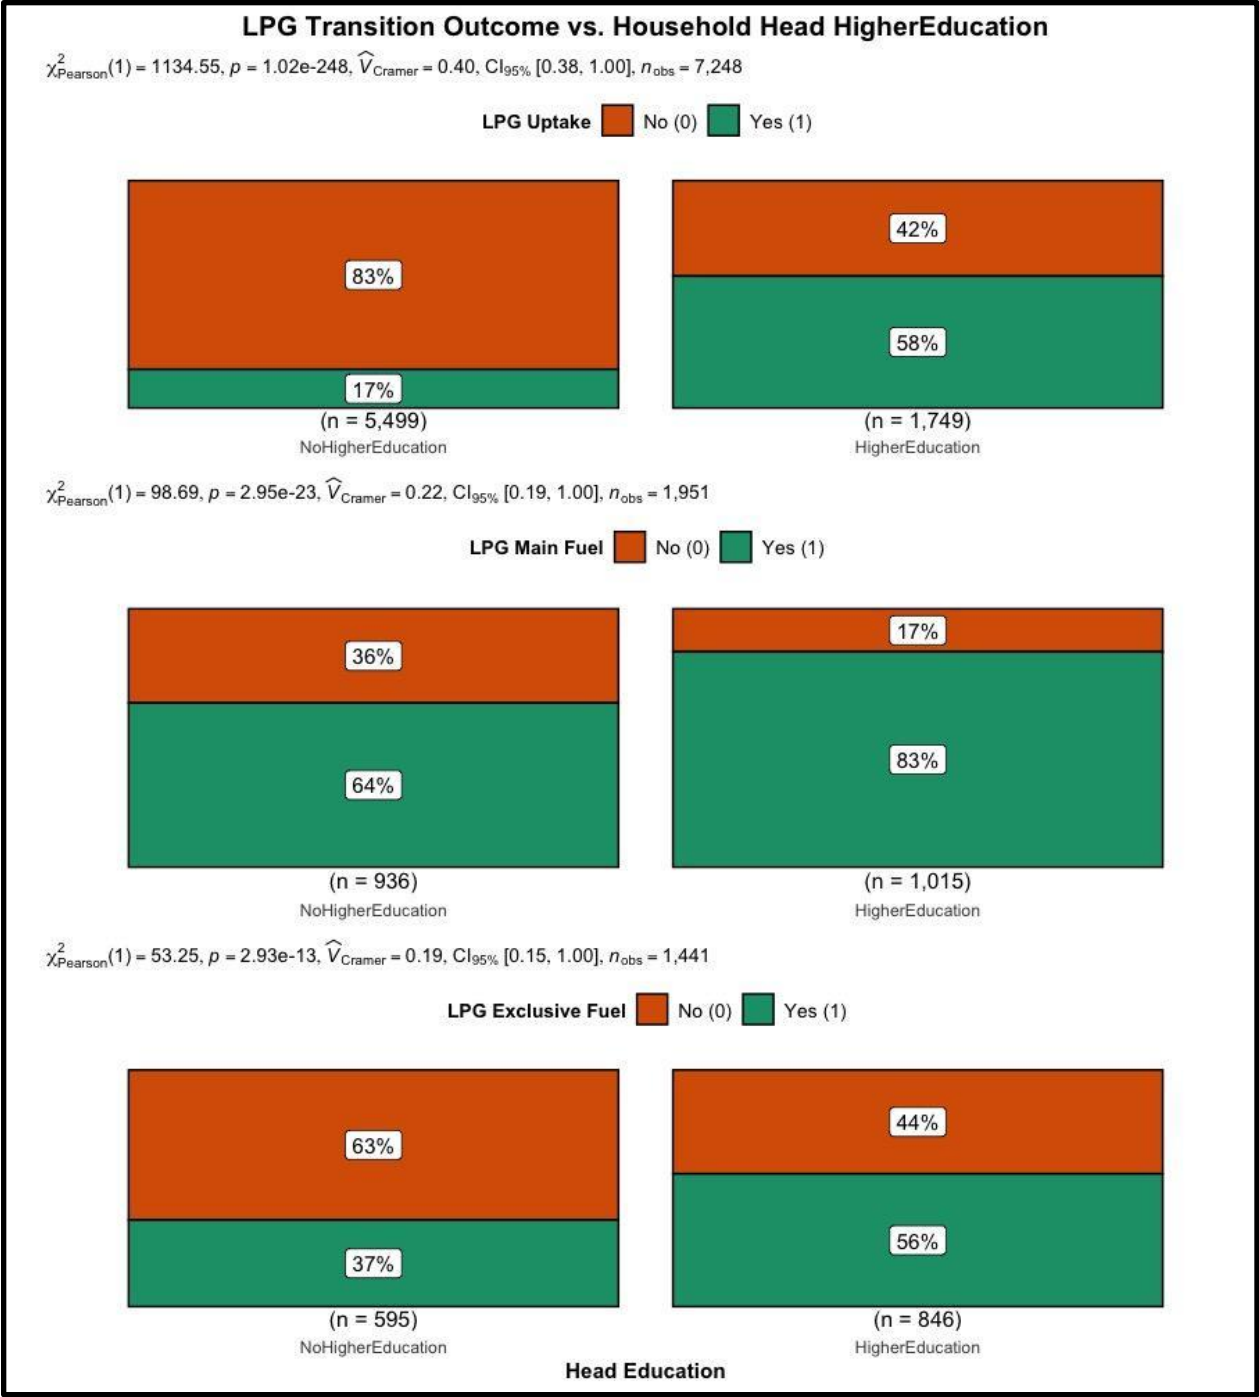

Figure SI24: Association between household head education and LPG transition choice outcomes

## **SI6: Discussion on LPG stacking**

The national (Figure SI27) and urban/rural (Figure SI28) breakup of cooking technology stacking pattern provide insight into stove stacking in Ghana. Literature suggests that household cooking in low- and middle-income countries often exhibits considerable stove stacking (when households have two or more stoves at home). To our knowledge, our data collection effort is the first to characterize stacking in Ghana in a nationally representative sample. We measured stacking by asking primary cooks for the quantity and type of every functioning stove owned by the household. Following this information, we asked respondents to rank their stoves from the most to least commonly used in their day-to-day cooking activities. We find that the majority of households that cook primarily with three-stone or charcoal stoves do not stack stoves (66% and 71%, respectively), meaning that they do not report using a secondary stove. Households that cook primarily with a three-stone stove most often report a charcoal stove as their secondary stove type, while charcoal stove users are roughly equally divided between those who stack with LPG and with three-stone stoves. Finally, LPG owners are the most likely to have a secondary stove, usually charcoal. Figure 3 depicts these results.

Our sample is about equally split between rural and urban households. We observe more stove stacking in urban areas. The main difference happens with charcoal users who have a secondary stove. Those in urban areas generally use LPG stoves as their second option, whereas in rural areas, three-stone stoves are more prevalent.

Given that the vast majority of households use a charcoal stove, three-stone fire, or LPG stove, we combined the remaining options (such as electric stoves) into an “other stove” category. Notably, discussions on stove stacking are limited to primary and secondary stoves as 97% of households report that they do not have any tertiary stoves. Also, while these questions were asked with respect to stove use during the dry season when the surveys were conducted, they remained representative of year-round stove use patterns in Ghana, as 94% of respondents reported not changing their primary stove in the wet season.

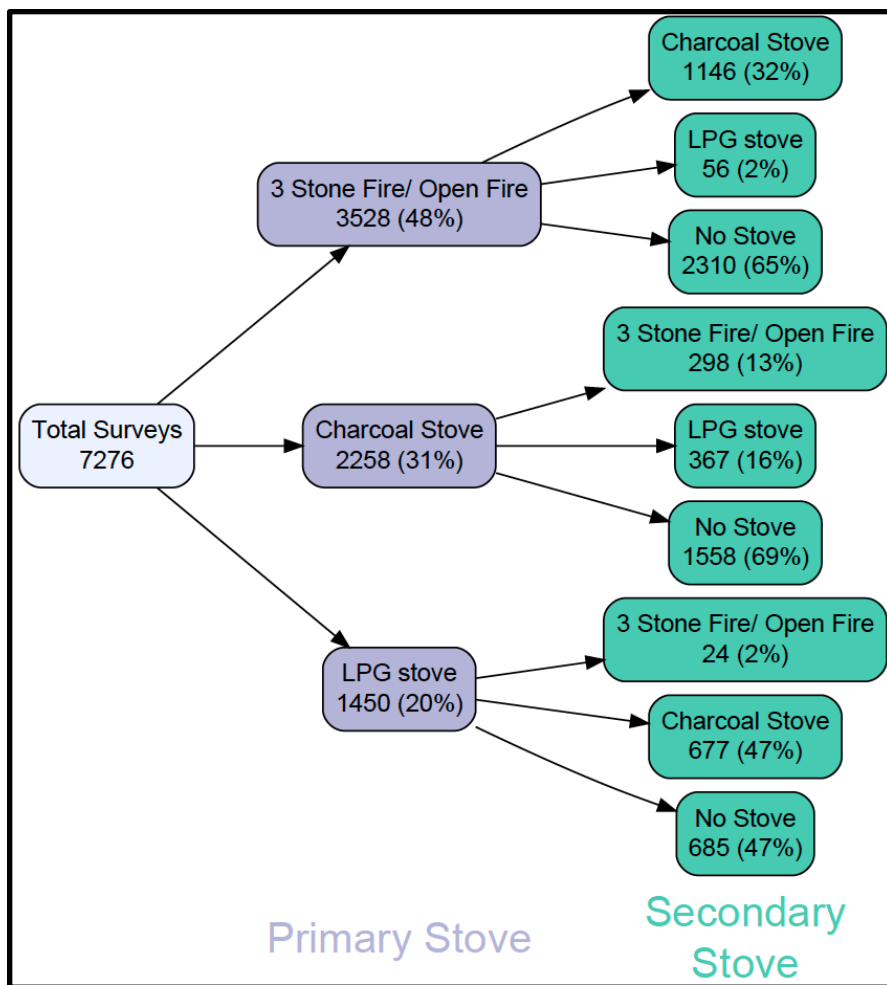

Figure SI25: Breakup of stove use pattern at the national level. For the purpose of readability, the figure does not display choices that are less than 1%. Hence, only three main cooking technologies are shown as the primary stove. Other cooking technologies and 'No Stove/ No Data' is not displayed for the primary stove. Similarly, other cooking technologies and 'primary/secondary same stove' are not displayed for the secondary stove.

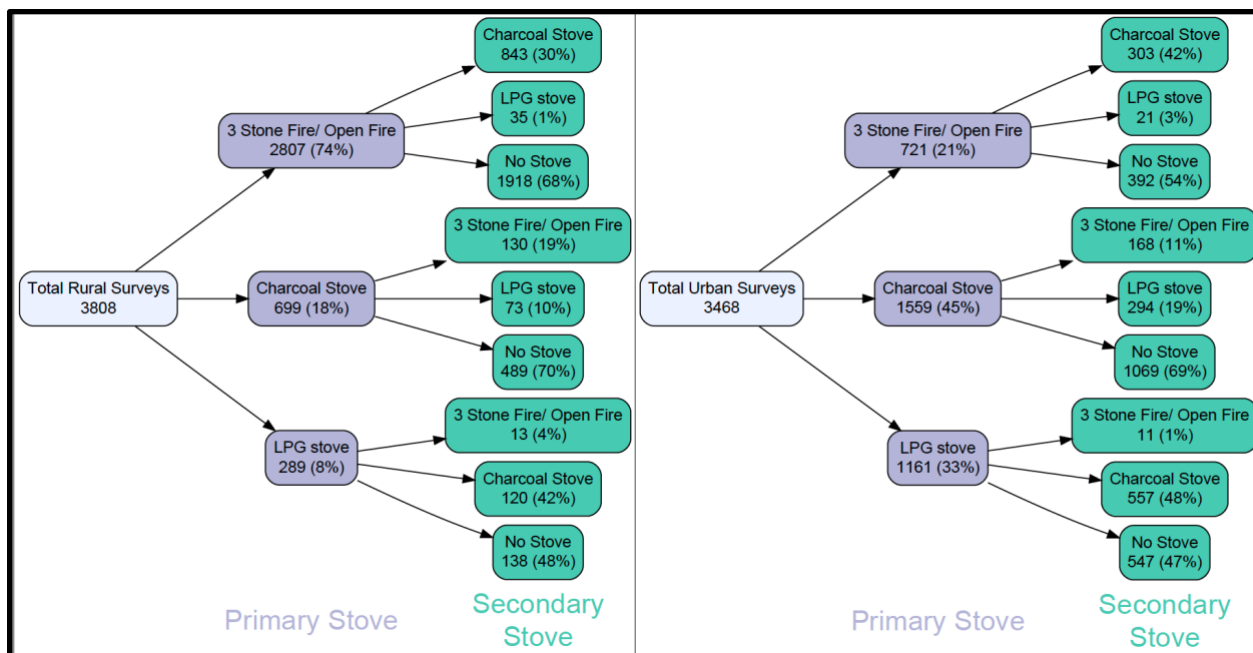

Figure SI26: Breakup of stove use pattern at urban (left panel) and rural (right panel) levels. For the purpose of readability, the figure does not display choices that are less than 1%. Hence, only three main cooking technologies are shown as the primary stove. Other cooking technologies and 'No Stove/ No Data' is not displayed for the primary stove. Similarly, other cooking technologies and 'primary/secondary same stove' are not displayed for the secondary stove.

## References

- Bailis, R. (2007). *Kitchen Performance Test (KPT) Version 3.0*. <https://cleancooking.org/binary-data/DOCUMENT/file/000/000/83-1.pdf>
- Hlavac, M. (2022). *Stargazer: Well-Formatted Regression and Summary Statistics Tables*. Social Policy Institute, Bratislava, Slovakia. R package version 5.2.3. <https://CRAN.R-project.org/package=stargazer>
- Kar, A., Brauer, M., Bailis, R., & Zerriffi, H. (2020). The risk of survey bias in self-reports vs. Actual consumption of clean cooking fuels. *World Development Perspectives*, 18, 100199. <https://doi.org/10.1016/j.wdp.2020.100199>
- Patil, I. (2021). Visualizations with statistical details: The “ggstatsplot” approach. *Journal of Open Source Software*, 6(61), 3167. <https://doi.org/10.21105/joss.03167>



412 Solt, F., Hu, Y., Keyes, O., Bolker, B., Müller, S., Leeper, T., Wallace, C., & Warshaw, C.  
413 (2022). *dotwhisker: Dot-and-Whisker Plots of Regression Results*. [https://cran.r-](https://cran.r-project.org/web/packages/dotwhisker/index.html)  
414 [project.org/web/packages/dotwhisker/index.html](https://cran.r-project.org/web/packages/dotwhisker/index.html)

# Annexure 1:

## Wealth Index Analysis

# National Household Needs Assessment

Socio-Economic Status

June 22 2022

# Contents

|          |                                                       |           |
|----------|-------------------------------------------------------|-----------|
| <b>1</b> | <b>Initial Household SES Variables</b>                | <b>3</b>  |
| 1.1      | Variables selected for first PCA estimation . . . . . | 3         |
| 1.2      | Recoding Variables . . . . .                          | 3         |
| 1.2.1    | Variables coded as 0 . . . . .                        | 3         |
| 1.2.2    | Categorical variables . . . . .                       | 4         |
| 1.3      | Analysis . . . . .                                    | 4         |
| 1.4      | Initial SES Index . . . . .                           | 5         |
| 1.5      | Initial PCA Post-estimation . . . . .                 | 7         |
| <b>2</b> | <b>Revised PCA and SES Index</b>                      | <b>10</b> |
| 2.1      | Revised PCA Post-estimation . . . . .                 | 11        |
| <b>3</b> | <b>SES by Rural-Urban, Region and Stove Type</b>      | <b>13</b> |
| 3.1      | SES by Rural-urban households and by region . . . . . | 13        |
| 3.2      | SES by stove type . . . . .                           | 14        |
| <b>4</b> | <b>Nomalizing the wealth scores</b>                   | <b>16</b> |

# List of Tables

|    |                                                                      |    |
|----|----------------------------------------------------------------------|----|
| 1  | Variables included in wealth index . . . . .                         | 3  |
| 2  | Responses to household ownership of livestock . . . . .              | 3  |
| 3  | Summary statistics of variables used for asset index . . . . .       | 4  |
| 4  | Responses to household ownership of land . . . . .                   | 4  |
| 5  | Socio-economic status . . . . .                                      | 5  |
| 6  | Summary statistics of variables used for asset index . . . . .       | 6  |
| 7  | Squared Multiple Correlation and Kaiser-Meyer-Olkin . . . . .        | 8  |
| 8  | Socio-economic status . . . . .                                      | 11 |
| 9  | Revise Squared Multiple Correlation and Kaiser-Meyer-Olkin . . . . . | 11 |
| 10 | Socio-economic status by rural-urban households . . . . .            | 13 |
| 11 | Socio-economic status by region (percent) . . . . .                  | 13 |
| 12 | Socio-economic status by primary stove . . . . .                     | 14 |
| 13 | Socio-economic status by secondary stove . . . . .                   | 15 |

# List of Figures

|   |                                       |    |
|---|---------------------------------------|----|
| 1 | Scree plot of initial PCA . . . . .   | 9  |
| 2 | Loading plot of initial PCA . . . . . | 10 |
| 3 | Scree plot of revised PCA . . . . .   | 12 |
| 4 | Loading plot of revised PCA . . . . . | 12 |
| 5 | Primary stove by SES . . . . .        | 14 |
| 6 | Secondary stove by SES . . . . .      | 15 |

# 1 Initial Household SES Variables

## 1.1 Variables selected for first PCA estimation

The variables selected for generating the wealth index is derived from household's durable asset ownership as well as household utilities and facilities. Table 1 provides the categories and some examples of the variables used for computing the initial wealth index.

Table 1: Variables included in wealth index

| Productive Assets   | Non-productive Assets  | Household Facilities |
|---------------------|------------------------|----------------------|
| Livestock (bulls)   | Table                  | Land ownership       |
| Livestock (cattle)  | Mattress               | House ownership      |
| Chicken             | Radio                  | Main light source    |
| Other poultry       | TV (black, color)      | Main water source    |
| Goats               | Room divider, cupboard | Main toilet facility |
| Sheep               | Satellite dish         | Floor material       |
| Pigs                | Fridge, freezer        | Wall material        |
| Grass cutter        | Phone, camera          | Roof material        |
| Rabbit              | Bicycle, motor         | Cooking space        |
| Horse, donkey, cart | Personal car           |                      |
| Tractor             | Commercial vehicle     |                      |
|                     | Electric appliances    |                      |

## 1.2 Recoding Variables

### 1.2.1 Variables coded as 0

- Missing
- Don't know
- Don't want to answer
- Other (in some instances)

**Example 1** In the example in Table 2, the first question (left-hand side sub-table) is "Does the HH currently own any livestock, herds, other farm animals?". Several participants respond with 'i don't want to know' and 'i don't want to answer'. This shows up in the subsequent questions as missing. For example in the subsequent question of 'how many bulls does your household own' (right-hand side sub-table).

Table 2: Responses to household ownership of livestock

|                        |           |        | Frequency | Share  |
|------------------------|-----------|--------|-----------|--------|
|                        |           |        | 1         | 0.22   |
|                        |           |        | 2         | 0.18   |
|                        |           |        | 3         | 0.10   |
|                        |           |        | 4         | 0.03   |
|                        |           |        | 5         | 0.04   |
|                        |           |        | 7         | 0.03   |
|                        |           |        | 8         | 0.01   |
|                        |           |        | 20+       | 0.01   |
|                        |           |        | .         | 99.39  |
|                        |           |        | Total     | 100.00 |
|                        |           |        |           |        |
|                        | Frequency | Share  |           |        |
| I Don't Know           | 11        | 0.15   |           |        |
| I Don't Want to Answer | 2         | 0.03   |           |        |
| No                     | 5354      | 72.71  |           |        |
| Yes                    | 1996      | 27.11  |           |        |
| Total                  | 7363      | 100.00 |           |        |

I recode the missing observations from the previous table as zeros in Table 3.

Table 3: Summary statistics of variables used for asset index

|       | Frequency | Share  |
|-------|-----------|--------|
| 0     | 7318      | 99.39  |
| 1     | 16        | 0.22   |
| 2     | 13        | 0.18   |
| 3     | 7         | 0.10   |
| 4     | 2         | 0.03   |
| 5     | 3         | 0.04   |
| 7     | 2         | 0.03   |
| 8     | 1         | 0.01   |
| 20    | 1         | 0.01   |
| Total | 7363      | 100.00 |

I recode the response to the question on land ownership; but subsequently drop this variable from the analysis as the question was randomized.

### 1.2.2 Categorical variables

- Recode categorical variables as binary

Table 4: Responses to household ownership of land

|              | Frequency | Share  |       | Frequency | Share  |
|--------------|-----------|--------|-------|-----------|--------|
| I Don't Know | 3         | 0.04   | 0     | 6830      | 92.76  |
| Acres        | 124       | 1.68   | 1     | 533       | 7.24   |
| Hectares     | 4         | 0.05   | Total | 7363      | 100.00 |
| Plot         | 405       | 5.50   |       |           |        |
| .            | 6827      | 92.72  |       |           |        |
| Total        | 7363      | 100.00 |       |           |        |

### Example 2

- Recode categorical variables as new categorical variables

**Example 3** The options for house ownership were: 1, Sole Ownership | 2, Joint Ownership | 3, Family/relation's house | 4, House provided rent free for unlimited time | 5, Perching | 6, Renting | -8, Other | -99, I don't know | -88, I don't want to answer.

I recoded to (-99=0) (-88=0) (-8=1) (3/5=1) (6=2) (1/2=3). 'Other' was also coded as '1' because all the options provided fell under government housing or mission housing.

Please see the do file for more details on the recoded variables.

### 1.3 Analysis

- Review and revise variables included in principal component analysis (PCA)
- First principal component is the wealth index
- Choice of using index as continuous or categorical (i.e. wealth quintiles)

## 1.4 Initial SES Index

Table 5 shows the distribution of the socio-economic status across the study households. This index is from the initial exploration with all potential variables that. The sample of households for which there is an SES index is a mere 3,622, just about half of the national sample. This brings up the question of how to revise the selected variables. I address this in the PCA post estimation section.

| Table 5: Socio-economic status |           |        |
|--------------------------------|-----------|--------|
|                                | Frequency | Share  |
| least poor                     | 724       | 19.99  |
| less poor                      | 724       | 19.99  |
| poor                           | 725       | 20.02  |
| more poor                      | 724       | 19.99  |
| very poor                      | 725       | 20.02  |
| Total                          | 3622      | 100.00 |

Table 6 presents the summary statistics of the variables used.

Table 6: Summary statistics of variables used for asset index

|         | Mean | Standard deviation | Min | Max |
|---------|------|--------------------|-----|-----|
| bull    | 0.02 | 0.33               | 0   | 20  |
| cat     | 0.17 | 2.03               | 0   | 100 |
| chick   | 3.34 | 9.32               | 0   | 100 |
| o_pltry | 0.32 | 2.92               | 0   | 100 |
| gt      | 1.04 | 3.41               | 0   | 50  |
| shp     | 0.57 | 2.98               | 0   | 100 |
| pg      | 0.13 | 1.39               | 0   | 50  |
| rbt     | 0.03 | 0.61               | 0   | 30  |
| grsct   | 0.00 | 0.20               | 0   | 16  |
| hors    | 0.01 | 0.15               | 0   | 5   |
| tv_bl   | 0.04 | 0.27               | 0   | 9   |
| tv_c    | 0.63 | 0.63               | 0   | 7   |
| cam     | 0.02 | 0.22               | 0   | 8   |
| was     | 0.02 | 0.17               | 0   | 8   |
| gen     | 0.01 | 0.19               | 0   | 9   |
| clck    | 0.21 | 0.48               | 0   | 10  |
| mat     | 1.31 | 1.11               | 0   | 10  |
| div     | 0.36 | 0.66               | 0   | 9   |
| rad     | 0.57 | 0.56               | 0   | 10  |
| tvd     | 0.49 | 0.61               | 0   | 9   |
| tabl    | 1.33 | 1.13               | 0   | 10  |
| phn     | 1.63 | 1.27               | 0   | 10  |
| frd     | 0.34 | 0.56               | 0   | 10  |
| frz     | 0.08 | 0.31               | 0   | 4   |
| bic     | 0.25 | 0.58               | 0   | 10  |
| cmv     | 0.05 | 0.25               | 0   | 6   |
| car     | 0.05 | 0.27               | 0   | 5   |
| trt     | 0.01 | 0.17               | 0   | 10  |
| fn      | 0.83 | 1.02               | 0   | 10  |
| ac      | 0.02 | 0.23               | 0   | 7   |
| cmp     | 0.10 | 0.36               | 0   | 9   |
| irn     | 0.43 | 0.58               | 0   | 9   |
| bat     | 0.01 | 0.18               | 0   | 10  |
| sm      | 0.13 | 0.44               | 0   | 10  |
| str     | 0.12 | 0.40               | 0   | 10  |
| ktl     | 0.08 | 0.33               | 0   | 9   |
| ckr     | 0.01 | 0.17               | 0   | 10  |
| tstr    | 0.02 | 0.23               | 0   | 10  |
| r_ckr   | 0.07 | 0.27               | 0   | 4   |
| mwv     | 0.04 | 0.24               | 0   | 9   |
| stv     | 0.01 | 0.17               | 0   | 10  |
| lnd     | 0.07 | 0.26               | 0   | 1   |
| hown    | 2.97 | 1.88               | 0   | 6   |
| kit     | 0.53 | 0.57               | 0   | 2   |
| lgt     | 0.81 | 0.39               | 0   | 1   |
| flr     | 0.87 | 0.34               | 0   | 1   |
| wll     | 0.40 | 0.49               | 0   | 1   |
| rof     | 0.46 | 0.50               | 0   | 1   |
| wat     | 2.22 | 0.77               | 0   | 3   |
| toi     | 0.94 | 0.61               | 0   | 2   |



## 1.5 Initial PCA Post-estimation

Table 7 presents the output of standard methods for studying correlation matrices to assess whether the variables have strong linear relations with each other. These methods can be seen as pre-estimation rather than as post-estimation methods. The first column contains the output for the inspection of the squared multiple correlation (the regression  $R^2$ ) of each variable on all other variables. The SMC measures help identify variables that cannot be explained well from the other variables, and can help reevaluate whether they should be included in the analysis. Some of the SMC are small but may not warrant exclusion.

The variables with the smallest SMC and under consideration for exclusion are

- animals (grass cutter, pig, rabbit)
- camera
- battery (inverter)
- stove top pressure cooker and
- kitchen space.

The second column of Table 7 contains the Kaiser–Meyer–Olkin (KMO) measure of sampling adequacy, which compares the correlations and the partial correlations between variables. If the partial correlations are relatively high compared to the correlations, the KMO measure is small, and a low-dimensional representation of the data is not possible.

Using the Kaiser (1974) characterization of KMO values,

- 0.00 to 0.49 unacceptable
- 0.50 to 0.59 miserable
- 0.60 to 0.69 mediocre
- 0.70 to 0.79 middling
- 0.80 to 0.89 meritorious
- 0.90 to 1.00 marvelous

we can say that our KMO value, 0.90 is marvelous.

Table 7: Squared Multiple Correlation and Kaiser-Meyer-Olkin

| Variable Name                  | Variable | SMC  | KMO         |
|--------------------------------|----------|------|-------------|
| Livestock (bulls)              | bull     | 0.15 | 0.55        |
| Livestock (cattle)             | cat      | 0.16 | 0.61        |
| Chicken                        | chick    | 0.28 | 0.75        |
| Poultry (other)                | o_pltry  | 0.18 | 0.71        |
| Goats                          | gt       | 0.25 | 0.75        |
| Sheep                          | shp      | 0.31 | 0.69        |
| Pigs                           | pg       | 0.10 | 0.62        |
| Rabbit                         | rbt      | 0.03 | 0.62        |
| Grass cutter                   | grsct    | 0.02 | 0.50        |
| Horse/donkey/cart              | hors     | 0.15 | 0.60        |
| TV (black and white)           | tv_bl    | 0.16 | 0.36        |
| Color TV                       | tv_c     | 0.58 | 0.91        |
| Camera                         | cam      | 0.06 | 0.93        |
| Washing machine                | was      | 0.19 | 0.95        |
| Generator                      | gen      | 0.42 | 0.90        |
| Clock                          | clck     | 0.26 | 0.96        |
| Mattress                       | mat      | 0.51 | 0.93        |
| Cupboard/wardrobe/room divider | div      | 0.41 | 0.96        |
| Radio                          | rad      | 0.14 | 0.91        |
| Satellite dish                 | tvd      | 0.55 | 0.92        |
| Table                          | tabl     | 0.31 | 0.95        |
| Phone                          | phn      | 0.42 | 0.93        |
| Fridge                         | frd      | 0.44 | 0.96        |
| Freezer                        | frz      | 0.27 | 0.95        |
| Bicycle                        | bic      | 0.17 | 0.80        |
| Commercial vehicle             | cmv      | 0.22 | 0.92        |
| Personal car                   | car      | 0.38 | 0.89        |
| Tractor                        | trt      | 0.42 | 0.80        |
| Fan                            | fn       | 0.60 | 0.96        |
| Air conditioning               | ac       | 0.25 | 0.89        |
| Computer (desktop/laptop)      | cmp      | 0.33 | 0.95        |
| Electric iron                  | irn      | 0.50 | 0.96        |
| Battery (inverter)             | bat      | 0.03 | 0.82        |
| Sewing machine                 | sm       | 0.11 | 0.84        |
| Store/shop/kiosk               | str      | 0.18 | 0.93        |
| Electric kettle                | ktl      | 0.40 | 0.95        |
| Electric pressure cooker       | ckr      | 0.64 | 0.77        |
| Electric toaster               | tstr     | 0.51 | 0.91        |
| Rice cooker                    | r_ckr    | 0.30 | 0.94        |
| Microwave oven                 | mwv      | 0.29 | 0.93        |
| Stovetop pressure cooker       | stv      | 0.03 | 0.90        |
| Land ownership                 | lnd      | 0.06 | 0.86        |
| House ownership                | hown     | 0.10 | 0.87        |
| Kitchen space                  | kit      | 0.08 | 0.86        |
| Main light source              | lgt      | 0.31 | 0.92        |
| Floor material                 | flr      | 0.34 | 0.82        |
| Wall material                  | wll      | 0.42 | 0.86        |
| Roofing material               | rof      | 0.22 | 0.84        |
| Main water source              | wat      | 0.29 | 0.94        |
| Toilet                         | toi      | 0.35 | 0.94        |
| <b>Overall</b>                 |          |      | <b>0.90</b> |

The scree plot in Figure 1 displays the number of the principal component versus its corresponding eigenvalue. We can use the scree plot to select the number of components to use based on the size of the eigenvalues. The ideal pattern is a steep curve, followed by a bend, and then a straight line. It's recommended to use the components in the steep curve before the first point that starts the line trend. The first component is used to predict the socio-economic status for our sample. This is because the first accounts for a large proportion while the remaining principal components account for a very small proportion of the variability (close to zero) and are probably unimportant.

Figure 1: Scree plot of initial PCA

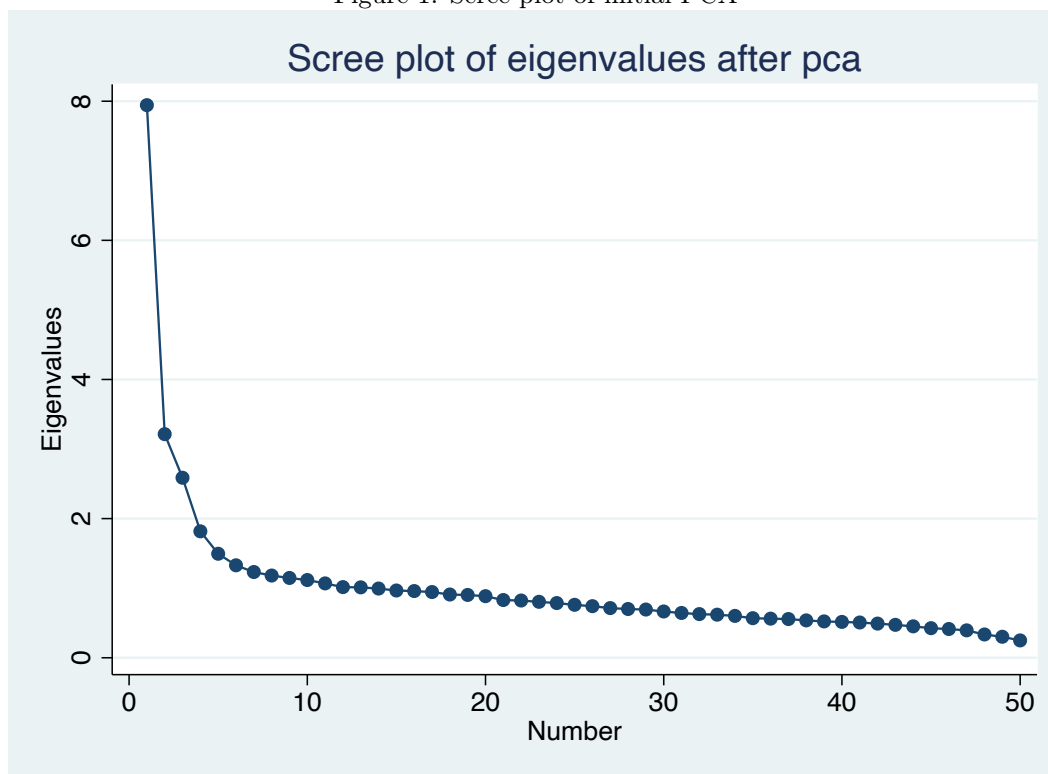

Figure 2 displays the loading plot and is used to identify which variables have the largest effect on each component. Loadings can range from -1 to 1. Loadings close to -1 or 1 indicate that the variable strongly influences the component. Loadings close to 0 indicate that the variable has a weak influence on the component.

Figure 2: Loading plot of initial PCA

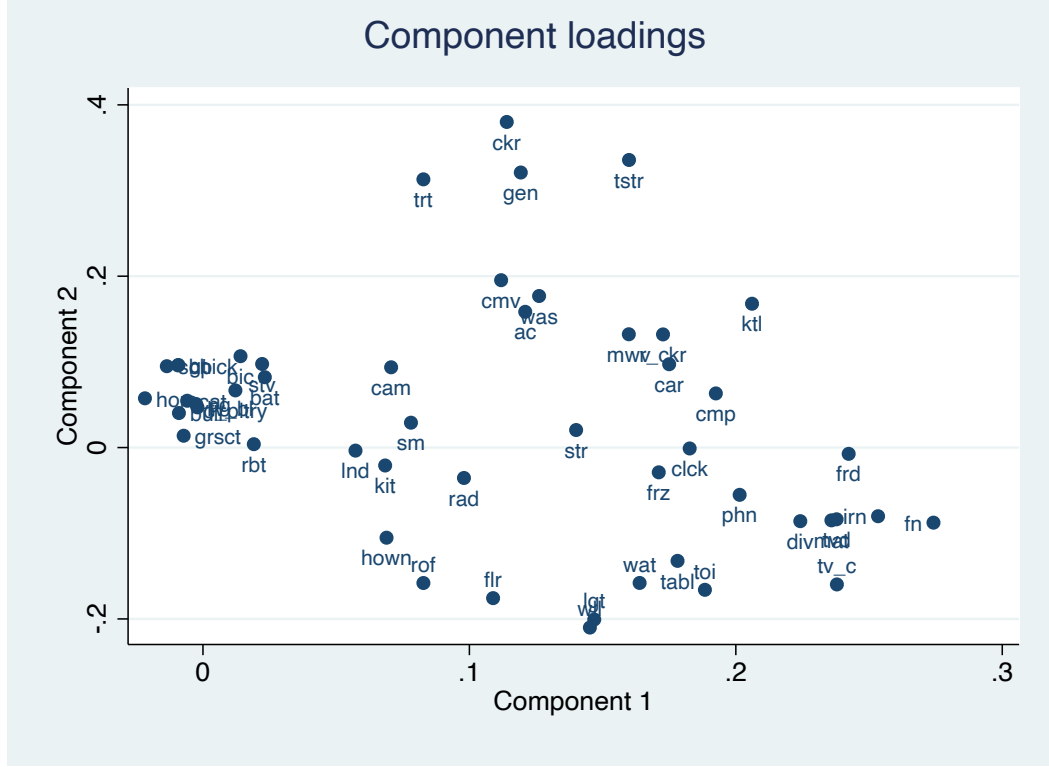

Based on the loading plot, the variables under consideration for exclusion are

- animals (grass cutter, chicken, rabbit, other poultry, horse)
- battery (inverter)
- stove top pressure cooker
- bicycle

## 2 Revised PCA and SES Index

From the initial PCA post estimation, I exclude variables with the smallest SMC and lowest effect on the first component loadings. I also exclude materials used to construct wall, roof and floor of house, as they were randomly assigned to a subset of the sample - this was the cause of the SES sample size being available for just about 3,622 households. I re-run the PCA and subsequently exclude land ownership and house ownership as they have a close to zero effect on the first component loadings.

Figure 8 presents the revised SES index. The sample size here is larger, and the SES is available for 7,306 households.

| Table 8: Socio-economic status |           |        |
|--------------------------------|-----------|--------|
|                                | Frequency | Share  |
| least poor                     | 1461      | 20.00  |
| less poor                      | 1461      | 20.00  |
| poor                           | 1461      | 20.00  |
| more poor                      | 1461      | 20.00  |
| very poor                      | 1462      | 20.01  |
| Total                          | 7306      | 100.00 |

## 2.1 Revised PCA Post-estimation

Table 9 presents the SMC and KMO for the revised PCA post estimation. The KMO of 0.93 is marvelous and higher than the initial KMO.

Table 9: Revise Squared Multiple Correlation and Kaiser-Meyer-Olkin

| Variable Name                  | Variable | SMC  | KMO         |
|--------------------------------|----------|------|-------------|
| Color TV                       | tv_c     | 0.55 | 0.92        |
| Camera                         | cam      | 0.04 | 0.92        |
| Motorcycle                     | was      | 0.12 | 0.93        |
| Generator                      | gen      | 0.22 | 0.83        |
| Clock                          | clck     | 0.25 | 0.96        |
| Mattress                       | mat      | 0.48 | 0.94        |
| Cupboard/wardrobe/room divider | div      | 0.41 | 0.97        |
| Radio                          | rad      | 0.11 | 0.92        |
| Satellite dish                 | tvd      | 0.51 | 0.92        |
| Table                          | tabl     | 0.30 | 0.95        |
| Phone                          | phn      | 0.39 | 0.94        |
| Fridge                         | frd      | 0.43 | 0.96        |
| Freezer                        | frz      | 0.21 | 0.96        |
| Commercial vehicle             | cmv      | 0.10 | 0.90        |
| Personal car                   | car      | 0.27 | 0.93        |
| Fan                            | fn       | 0.60 | 0.96        |
| Air conditioning               | ac       | 0.19 | 0.88        |
| Computer (desktop/laptop)      | cmp      | 0.31 | 0.95        |
| Electric iron                  | irn      | 0.47 | 0.96        |
| Sewing machine                 | sm       | 0.09 | 0.86        |
| Store/shop/kiosk               | str      | 0.13 | 0.94        |
| Electric kettle                | ktl      | 0.25 | 0.95        |
| Electric pressure cooker       | ckr      | 0.18 | 0.75        |
| Electric toaster               | tstr     | 0.13 | 0.87        |
| Rice cooker                    | r_ckr    | 0.27 | 0.93        |
| Microwave oven                 | mwv      | 0.29 | 0.92        |
| Kitchen space                  | kit      | 0.06 | 0.92        |
| Main light source              | lgt      | 0.24 | 0.92        |
| Main water source              | wat      | 0.25 | 0.93        |
| Toilet                         | toi      | 0.33 | 0.94        |
| <b>Overall</b>                 |          |      | <b>0.93</b> |

The scree plot indicates that the first component is sufficient to compute the socio-economic status index for our sample.

Figure 3: Scree plot of revised PCA

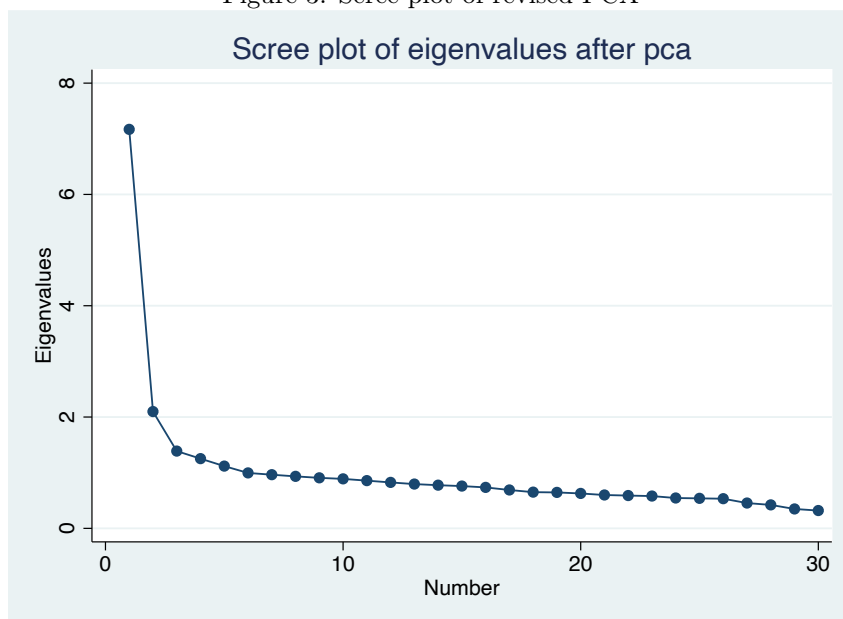

The loading plot suggests that the selected variables have a stronger influence on the first component, compared to the initial selection.

Figure 4: Loading plot of revised PCA

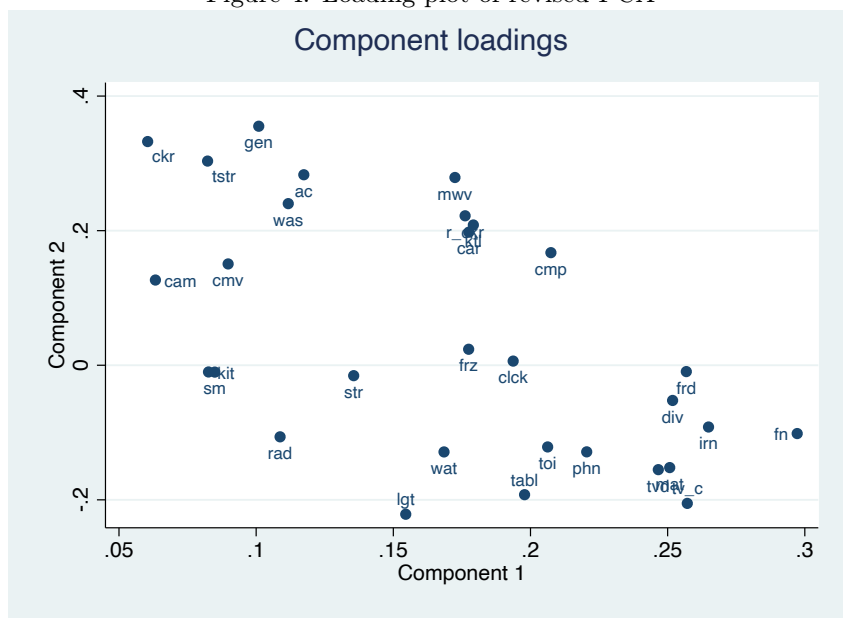

### 3 SES by Rural-Urban, Region and Stove Type

#### 3.1 SES by Rural-urban households and by region

Table 10: Socio-economic status by rural-urban households

|            | Frequency | Share  |
|------------|-----------|--------|
| rural      |           |        |
| least poor | 322       | 4.41   |
| less poor  | 505       | 6.91   |
| poor       | 729       | 9.98   |
| more poor  | 988       | 13.52  |
| very poor  | 1275      | 17.45  |
| Total      | 3819      | 52.27  |
| urban      |           |        |
| least poor | 1139      | 15.59  |
| less poor  | 956       | 13.09  |
| poor       | 732       | 10.02  |
| more poor  | 473       | 6.47   |
| very poor  | 187       | 2.56   |
| Total      | 3487      | 47.73  |
| Total      |           |        |
| least poor | 1461      | 20.00  |
| less poor  | 1461      | 20.00  |
| poor       | 1461      | 20.00  |
| more poor  | 1461      | 20.00  |
| very poor  | 1462      | 20.01  |
| Total      | 7306      | 100.00 |

As expected, Greater Accra has the highest percentage of 'least poor' households and the lowest percentage of 'very poor' households.

Table 11: Socio-economic status by region (percent)

| Region        | least poor | less poor | poor   | more poor | very poor | Total  |
|---------------|------------|-----------|--------|-----------|-----------|--------|
| Ahafo         | 4.24       | 5.13      | 4.79   | 6.84      | 3.49      | 4.90   |
| Ashanti       | 14.92      | 14.03     | 9.86   | 7.26      | 3.90      | 9.99   |
| Bono          | 6.43       | 6.23      | 5.34   | 4.72      | 2.87      | 5.12   |
| Bono East     | 3.56       | 3.29      | 5.13   | 5.54      | 6.98      | 4.90   |
| Central       | 5.89       | 7.94      | 11.36  | 11.02     | 6.16      | 8.47   |
| Eastern       | 9.51       | 10.20     | 10.95  | 10.47     | 4.17      | 9.06   |
| Greater Accra | 25.19      | 14.58     | 5.82   | 2.81      | 0.55      | 9.79   |
| North East    | 0.68       | 1.23      | 4.45   | 5.68      | 12.11     | 4.83   |
| Northern      | 2.33       | 3.97      | 5.07   | 4.18      | 14.02     | 5.91   |
| Oti           | 3.01       | 4.24      | 6.64   | 6.43      | 4.31      | 4.93   |
| Savannah      | 1.85       | 2.26      | 4.52   | 6.78      | 9.17      | 4.91   |
| Upper East    | 1.98       | 3.29      | 3.29   | 5.89      | 12.79     | 5.45   |
| Upper West    | 2.53       | 3.15      | 3.29   | 5.13      | 9.78      | 4.78   |
| Volta         | 4.59       | 5.27      | 6.57   | 6.78      | 4.86      | 5.61   |
| Western       | 8.28       | 10.06     | 8.01   | 5.34      | 1.16      | 6.57   |
| Western North | 5.00       | 5.13      | 4.93   | 5.13      | 3.69      | 4.78   |
| Total         | 100.00     | 100.00    | 100.00 | 100.00    | 100.00    | 100.00 |
|               | (1461)     | (1461)    | (1461) | (1461)    | (1462)    | (7306) |

### 3.2 SES by stove type

As expected the least poor household largely use LPG while the most poor household typically use the 3-stone cook stoves or open fires as primary cookstoves.

Figure 5: Primary stove by SES

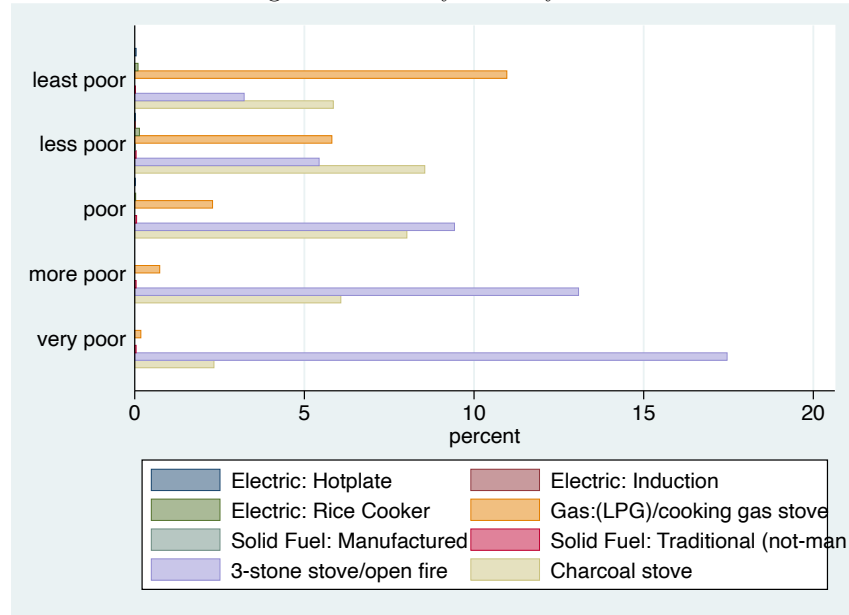

Table 12: Socio-economic status by primary stove

| Primary Stove                              | least poor | less poor | poor   | more poor | very poor | Total  |
|--------------------------------------------|------------|-----------|--------|-----------|-----------|--------|
| Electric: Hotplate                         | 0.21       | 0.07      | 0.07   | 0.00      | 0.00      | 0.07   |
| Electric: Induction                        | 0.00       | 0.07      | 0.00   | 0.00      | 0.00      | 0.01   |
| Electric: Rice Cooker                      | 0.48       | 0.69      | 0.14   | 0.00      | 0.00      | 0.26   |
| Gas:(LPG)/cooking gas stove                | 54.30      | 29.03     | 11.56  | 3.70      | 0.90      | 19.99  |
| Solid Fuel: Manufactured                   | 0.00       | 0.07      | 0.00   | 0.00      | 0.00      | 0.01   |
| Solid Fuel: Traditional (not-manufactured) | 0.07       | 0.21      | 0.28   | 0.21      | 0.21      | 0.19   |
| 3-stone stove/open fire                    | 15.97      | 27.15     | 47.51  | 65.62     | 87.22     | 48.62  |
| Charcoal stove                             | 28.97      | 42.71     | 40.43  | 30.47     | 11.67     | 30.83  |
| Total                                      | 100.00     | 100.00    | 100.00 | 100.00    | 100.00    | 100.00 |
|                                            | (1453)     | (1440)    | (1427) | (1434)    | (1440)    | (7194) |



In figure 6 all socio-economic groups use charcoal as secondary stove. However the least poor tend to have charcoal stoves as secondary stoves compared to other SES groups.

Figure 6: Secondary stove by SES

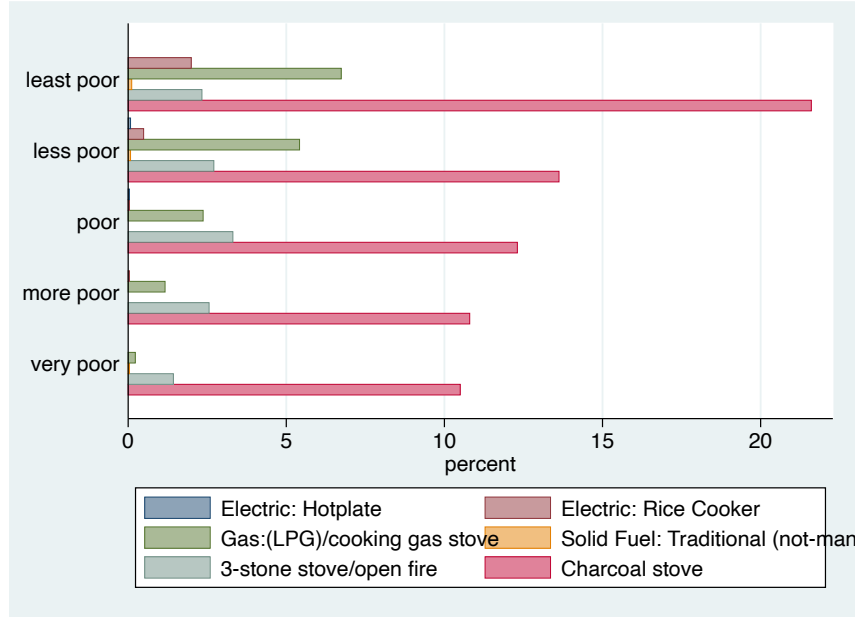

Table 13: Socio-economic status by secondary stove

| Sec Stove                                  | least poor | less poor | poor   | more poor | very poor | Total  |
|--------------------------------------------|------------|-----------|--------|-----------|-----------|--------|
| Electric: Hotplate                         | 0.00       | 0.34      | 0.21   | 0.00      | 0.00      | 0.11   |
| Electric: Rice Cooker                      | 6.08       | 2.18      | 0.21   | 0.26      | 0.00      | 2.56   |
| Gas:(LPG)/cooking gas stove                | 20.55      | 24.20     | 13.12  | 8.01      | 1.85      | 15.92  |
| Solid Fuel: Traditional (not-manufactured) | 0.34       | 0.34      | 0.00   | 0.00      | 0.31      | 0.23   |
| 3-stone stove/open fire                    | 7.12       | 12.10     | 18.33  | 17.57     | 11.73     | 12.34  |
| Charcoal stove                             | 65.90      | 60.84     | 68.12  | 74.16     | 86.11     | 68.84  |
| Total                                      | 100.00     | 100.00    | 100.00 | 100.00    | 100.00    | 100.00 |
|                                            | (871)      | (595)     | (480)  | (387)     | (324)     | (2657) |

## 4 Nomalizing the wealth scores

The range of wealth index score (p1) was -3.8 to +43.9 with median of -0.5. As negative wealth index scores are intuitively difficult to comprehend, we planned a modified score list such that the lowest score is +1. So, we added +4.8 (+3.8 +1) to p1 values for transformation. Thus, we created a modified wealth index score (mod\_sc) with range of +1 to +48.7 and median value of +4.3
